# Supplementary material
Source: ML conference proceedings conference paper supplement (https://openreview.net/forum?id=w0O3F4cTNfG)
Supplement: supplementary_material [file attachment]

---

# Causal Discovery in Linear Latent Variable Models Subject to Measurement Error

---

**Yuqin Yang\***  
Georgia Institute of Technology

**AmirEmad Ghassami**  
Johns Hopkins University

**Mohamed Nafea**  
University of Detroit Mercy

**Negar Kiyavash**  
École Polytechnique Fédérale  
de Lausanne (EPFL)

**Kun Zhang**  
Carnegie Mellon University  
& MBZUAI

**Ilya Shpitser**  
Johns Hopkins University

## Abstract

We focus on causal discovery in the presence of measurement error in linear systems where the mixing matrix, i.e., the matrix indicating the independent exogenous noise terms pertaining to the observed variables, is identified up to permutation and scaling of the columns. We demonstrate a somewhat surprising connection between this problem and causal discovery in the presence of unobserved parentless causes, in the sense that there is a mapping, given by the mixing matrix, between the underlying models to be inferred in these problems. Consequently, any identifiability result based on the mixing matrix for one model translates to an identifiability result for the other model. We characterize to what extent the causal models can be identified under a two-part faithfulness assumption. Under only the first part of the assumption (corresponding to the conventional definition of faithfulness), the structure can be learned up to the causal ordering among an ordered grouping of the variables but not all the edges across the groups can be identified. We further show that if both parts of the faithfulness assumption are imposed, the structure can be learned up to a more refined ordered grouping. As a result of this refinement, for the latent variable model with unobserved parentless causes, the structure can be identified. Based on our theoretical results, we propose causal structure learning methods for both models, and evaluate their performance on synthetic data.

## 1 Introduction

Learning causal structure among the variables of a system from observational data has received considerable attention in the literature, since subject matter knowledge on causal relationships is often incomplete or impossible to obtain in many applications [24, 16]. In many real-life systems, not all variables of interest or all direct common causes of those variables can be observed. This necessitates approaches for structure learning capable of dealing with latent variables. For the case that no a-priori restrictions on the functional form of causal mechanisms are imposed, constraint-based algorithms such as the Fast Causal Inference (FCI) algorithm have been proposed [24]. Such approaches are often unable to identify the direction of the majority of causal connections in the system, which motivates placing additional, often parametric, restrictions on the generating model. One of the most commonly used restrictions is to assume that the model is linear with non-Gaussian exogenous noise terms [21, 22, 12, 10]. This generating model leads to identification of the existence and orientation of all edges in a causal model, assuming that no latent variables that are common causes of two or more variables exist [21, 22]. Moreover, in such models even when latent variable common causes exist, it is still possible to orient additional edges compared to algorithms such as FCI [12, 19, 1].

---

\*Correspondence to: yuqinyang@gatech.edu

In certain applications, although some of the variables of interest (called underlying variables) are latent, we may have access to noisy measurements of them [17, 13, 29, 18, 11]. In this case, conditional independence patterns among observed variables (that are noisy measurements of underlying variables) are different from those among the underlying (measurement-error-free) variables. In general, constraint-based approaches to causal discovery are not able to correct for the difference in observed independence due to the presence of measurement error, and thus will produce erroneous edge adjacencies and orientations. Similarly, naive application of methods based on non-Gaussian exogenous noise assumption may also fail in recovering the correct causal relations in the presence of measurement error. This is due to the fact that the extra measurement noise terms break the asymmetry utilized by those methods.

In this paper, we bring additional insight into the problem of causal discovery under measurement error by showing a surprising connection between linear structural equation models (SEMs) where variables are measured with error, and linear SEMs with hidden variables. In particular, we consider two linear SEMs. In the first model, the unobserved variables are in fact of interest and can appear in any part of the causal structure of the system, but we assume that noisy measurements of these unobserved variables are available. We refer to this model as the linear SEM with measurement error (SEM-ME). The second model does not require measurements of the latent variables, as they are not of primary interest, yet we assume that all latent variables are root variables, meaning that they are not causally affected by any other latent or observed variables in the system. We refer to this model as the linear SEM with unobserved roots (SEM-UR). It is noteworthy that assuming latent variables are limited to be root variables does not affect the estimated total causal effects among the observed variables (see Remark 1 in Section 2.2), and provides a representation of a latent variable model that is consistent with these causal effects. For this reason, this restriction is common in the literature of causal inference [8, 9, 12, 5].

We study the identification of linear SEM-MEs and SEM-URs in a setup where the independent exogenous noise terms that causally (directly or indirectly) affect each observed variable can be identified. That is, the mixing matrix of the linear system that transforms exogenous noise terms to observed variables is identified up to permutation and scaling of the columns. This can be satisfied, for example, if all independent exogenous noise terms are non-Gaussian. Our first main contribution is presenting a mapping between the linear SEM-MEs and SEM-URs, which demonstrates a correspondence between a weighted causal diagram<sup>2</sup> generated by SEM-UR and a set of weighted causal diagrams from the SEM-ME (Theorem 1). The models in this correspondence all possess the same mixing matrix. Consequently, any identifiability result based on the mixing matrix for one model is applicable to the other model. This allows us to study the problem of causal discovery in these two models together.

Additionally, we study the identifiability of linear SEM-MEs and SEM-URs, and show how it benefits from a two-part faithfulness assumption. The first part prevents existence of zero total causal effects of a variable on its descendants and the second part prevents cancellation or proportionality among specific edges. Our second main contribution is to characterize the extent of identifiability of the causal model under our faithfulness assumption. We demonstrate that if only the first part of the faithfulness assumption is imposed, the model can be learned up to an equivalence class characterized by an ordered grouping of the variables which we call *ancestral ordered grouping* (AOG). In this grouping, the induced graph on the variables of each group is a star graph (see Section 4.3). Although the AOG is identified, not all edges across the groups or the group centers (or their exogenous noise terms) are identifiable (Theorem 2). The AOG characterization is a refined version of the ordered grouping proposed in [29]. We further show that if both parts of the faithfulness assumption are imposed, the model can be learned up to an equivalence class characterized by a more refined ordered grouping which we call *direct ordered grouping* (DOG). Edges across groups can be identified under this characterization, yet the the group centers (or their exogenous noise terms) remain unidentified (Theorem 3). This characterization further implies that the ground-truth structure of a SEM-UR is uniquely identifiable (Corollary 3). Lastly, we show that models in the DOG equivalence class are strictly sparser than other models in the AOG equivalence class (Proposition 4). We propose causal structure learning methods for both SEM-ME and SEM-UR based on this property, and evaluate their performance on synthetic data.

---

<sup>2</sup>A weighted causal diagram is the directed graph corresponding to the linear model which associates the coefficient of variable  $X_1$  in the structural equation for  $X_2$  to the edge from  $X_1$  to  $X_2$ .

## 2 Model description

In this section, we first introduce the two models considered in this paper, namely linear SEM-ME and SEM-UR. We then discuss a model assumption needed for our identifiability results.

### 2.1 Linear structural equation model with measurement error (SEM-ME)

**Definition 1 (Linear SEM-ME)** A linear SEM-ME consists of a set of “underlying” variables which can be partitioned into unobserved underlying variables  $\mathcal{Z} = \{Z_1, \dots, Z_{p_z}\}$  and observed underlying variables  $\mathcal{Y} = \{Y_1, \dots, Y_{p-p_z}\}$ . In addition, we have another set of observed variables  $\mathcal{U} = \{U_1, \dots, U_{p_z}\}$  corresponding to the noisy measurements of  $\mathcal{Z}$ . The underlying variables in  $\mathcal{Z} \cup \mathcal{Y}$  can be arranged in a total (causal) order (such that no later variable in the order can cause any earlier variable), and variables  $V_i \in \mathcal{Z} \cup \mathcal{Y}$  and  $U_i \in \mathcal{U}$  are generated as follows:

$$V_i = \sum_{j: V_j \in Pa(V_i)} c_{ij} V_j + N_{V_i} \quad i \in [p]; \quad U_i = Z_i + N_{U_i}, \quad i \in [p_z], \quad (1)$$

where  $[n] := \{1, 2, \dots, n\}$ ,  $Pa(V_i) \subseteq \mathcal{Z} \cup \mathcal{Y}$  denotes direct causes of  $V_i$ .  $N_{V_i}$  (resp.  $N_{U_i}$ ) is the exogenous noise term (resp. the measurement error) corresponding to  $V_i$  (resp.  $U_i$ ).

We define the weighted causal diagram of the linear SEM-ME as a weighted directed graph where the nodes are the variables in  $\mathcal{Z} \cup \mathcal{Y}$ . There is a directed edge (causal connection) from  $V_i$  to  $V_j$  with weight  $c_{ji}$  if and only if  $c_{ji} \neq 0$ , for  $V_i, V_j \in \mathcal{Z} \cup \mathcal{Y}$ . Because of our causal order assumption, the causal diagram will be acyclic. We use the terms node and variable interchangeably. The linear SEM-ME in this work is a generalization of the linear causal model with measurement error proposed in [29], in the sense that some of the underlying variables can be observed.

We define an *unobserved leaf node* (u-leaf node) as an unobserved underlying variable in  $\mathcal{Z}$  that does not have any children in  $\mathcal{Z} \cup \mathcal{Y}$ . The rest of the underlying variables are referred to as *non u-leaf nodes* (nu-leaf nodes): These include unobserved non-leaf underlying variables, which have children in  $\mathcal{Z} \cup \mathcal{Y}$ , and observed underlying variables in  $\mathcal{Y}$ . Similar to the argument in [29], given observed data generated by the linear SEM-ME in Equation (1), for a u-leaf node  $Z_i$ , its exogenous noise term  $N_{Z_i}$  is not distinguishable from its measurement error  $N_{U_i}$ . This follows because  $Z_i$  is not observed, and  $N_{Z_i}$  only influences one observed variable which is the noisy measurement  $U_i$ . Therefore, we restrict our focus to the following canonical form.

**Definition 2 (Canonical form of a linear SEM-ME)** The canonical form of a linear SEM-ME is the one in which all u-leaf nodes have no exogenous noise terms. Specifically,

$$\begin{bmatrix} Z^L \\ Z^{NL} \\ Y \end{bmatrix} = \begin{bmatrix} \mathbf{D} \\ \mathbf{C}_Z \\ \mathbf{C}_Y \end{bmatrix} Z^{NU} + \begin{bmatrix} 0 \\ N_{Z^{NL}} \\ N_Y \end{bmatrix}, \quad U = \begin{bmatrix} Z^L \\ Z^{NL} \end{bmatrix} + \begin{bmatrix} N_{Z^L} + N_{U^L} \\ N_{U^{NL}} \end{bmatrix}, \quad (2)$$

where  $Z^{NL}$ ,  $Z^L$ ,  $Y$  are the vectors of unobserved underlying non-leaf variables, u-leaf nodes, and observed underlying variables, respectively.  $N_{Z^{NL}}$ ,  $N_{Z^L}$ , and  $N_Y$  are the corresponding noise vectors.  $Z^{NU} = [Z^{NL}; Y]$  is the vector of nu-leaf nodes.  $U$  is the vector of noisy measurements and  $N_{U^{NL}}$  and  $N_{U^L}$  denote the noise vectors corresponding to the measurements of  $Z^{NL}$  and  $Z^L$ , respectively.  $\mathbf{C}$  represents the causal connections among nu-leaf nodes, and can be partitioned into  $[\mathbf{C}_Z; \mathbf{C}_Y]$  corresponding to  $[Z^{NL}; Y]$ , respectively.  $\mathbf{D}$  represents the causal connections from nu-leaf nodes to u-leaf nodes. Note that  $\mathbf{C}$  can be arranged into a strictly lower triangular matrix via simultaneous column and row permutations (due to the acyclicity assumption).

### 2.2 Linear structural equation model with unobserved roots (SEM-UR)

**Definition 3 (Linear SEM-UR)** A linear SEM-UR consists of a set of observed variables  $\mathcal{X} = \{X_1, \dots, X_q\}$  and another set of latent variables  $\mathcal{H} = \{H_1, \dots, H_l\}$ . All latent variables are assumed to be root variables (have no direct causes). The observed variables are arranged in a causal order, and each observed variable is directly influenced by a linear combination of other observed and latent variables, plus an independent exogenous noise term.

$$H_i = N_{H_i}, \quad i \in [l]; \quad X_j = \sum_{i \in [l]} b_{ji} H_i + \sum_{k < j} a_{jk} X_k + N_{X_j}, \quad j \in [q]. \quad (3)$$

We define the weighted causal diagram of the linear SEM-UR as a directed graph where the nodes are the observed and latent variables in  $\mathcal{X} \cup \mathcal{H}$ . There is a causal connection from  $X_i$  (resp.  $H_i$ ) to  $X_j$  with weight  $a_{ji}$  (resp.  $b_{ji}$ ) if and only if  $a_{ji}$  (resp.  $b_{ji}$ )  $\neq 0$ . Because of our causal order assumption, the causal diagram will be acyclic. Note that unlike in [12] and [19], we consider a broader model

which allows latent variables to have a single observed child. However, unlike the works considering relations among latent variables [1, 26, 3, 27], we restrict all latent variables to roots; see Remark 1.

A linear SEM-UR can be written in the following matrix form:

$$H = N_H; \quad X = \mathbf{B}H + \mathbf{A}X + N_X, \quad (4)$$

where  $X = [X_1 \cdots X_q]^\top$  and  $H = [H_1 \cdots H_l]^\top$  are the vectors of observed and latent variables, respectively.  $N_X = [N_{X_1} \cdots N_{X_q}]^\top$  and  $N_H = [N_{H_1} \cdots N_{H_l}]^\top$  represent the vectors of independent noise terms associated with  $X$  and  $H$ , respectively.  $\mathbf{B}$  represents the causal connections from latent to observed variables, and  $\mathbf{A}$  represents the causal connections among observed variables, which can be assumed to be a strictly lower-triangular matrix (due to the acyclicity assumption).

**Remark 1** *There exist works aiming to find the causal relations among the latent variables (as well as their relations with the measured variables) [23, 26, 3, 1, 27]. Our definition of a linear SEM-UR requires all the latent variables to be parentless. This assumption is common in the literature of causal inference, as it does not restrict the feasible total causal effects (i.e., sum of products of path coefficients) among the observed variables [8, 9, 5]. Specifically, let us start from a general linear latent variable model in which some latent variables have parents. Hoyer et al. [12] proposed an algorithm which maps such general model to one in which latent variables are parentless. They showed that the resulting model is observationally and causally equivalent to the original model, i.e., the joint distributions of observed variables are identical, and all causal effects of observed variables on other observed variables are identical in the models before and after the mapping.*

### 2.3 Separability assumption

For both models in Sections 2.1 and 2.2, we assume that the noise components can be separated from observations (i.e., the mixing matrices are recoverable). We first describe the mixing process for each of the two models, and then state our separability assumption.

From Equation (2), we can write all underlying variables in the linear SEM-ME in terms of the independent noise terms, as follows.

$$\begin{bmatrix} Z^L \\ Z^{NL} \\ Y \end{bmatrix} = \mathbf{W}^{ME} \begin{bmatrix} N_{Z^{NL}} \\ N_Y \end{bmatrix}, \quad \text{where } \mathbf{W}^{ME} = \begin{bmatrix} \mathbf{D}(\mathbf{I} - \mathbf{C})^{-1} \\ (\mathbf{I} - \mathbf{C})_Z^{-1} \\ (\mathbf{I} - \mathbf{C})_Y^{-1} \end{bmatrix}. \quad (5)$$

$\mathbf{I}$  is the identity matrix, and  $(\mathbf{I} - \mathbf{C})_Z^{-1}$  and  $(\mathbf{I} - \mathbf{C})_Y^{-1}$  represent the rows of  $(\mathbf{I} - \mathbf{C})^{-1}$  corresponding to  $Z^{NL}$  and  $Y$ , respectively. Using the relation between  $U$  and  $Z$  in Equation (2), the two types of observed variables, i.e., measurements  $U$  and observed underlying variables  $Y$ , can be written as

$$\begin{bmatrix} U \\ Y \end{bmatrix} = \underbrace{\begin{bmatrix} \mathbf{W}^{ME} & \mathbf{I} \\ & \mathbf{0} \end{bmatrix}}_{\mathbf{W}} \begin{bmatrix} N_{Z^{NL}} \\ N_Y \\ N_{Z^L} + N_{U^L} \\ N_{U^{NL}} \end{bmatrix}. \quad (6)$$

We refer to  $\mathbf{W}$  as the overall mixing matrix of the system. Given any column permuted and rescaled version of  $\mathbf{W}$ , we can recover matrix  $\mathbf{W}^{ME}$  by removing the submatrix  $[\mathbf{I} \ \mathbf{0}]^\top$  of size  $p \times p_z$  corresponding to  $U$ . Recall that  $p_z$  is the cardinality of  $Z$  (which is the same as the cardinality of  $U$ ).

Similarly, according to Equation (4), observed variables in the linear SEM-UR can be written in terms of the independent noise terms as

$$X = \mathbf{W}^{UR} \begin{bmatrix} N_H \\ N_X \end{bmatrix}, \quad \text{where } \mathbf{W}^{UR} = [(\mathbf{I} - \mathbf{A})^{-1}\mathbf{B} \quad (\mathbf{I} - \mathbf{A})^{-1}]. \quad (7)$$

**Assumption 1 (Separability)** *The linear SEM-ME (resp. linear SEM-UR) is separable, that is, the mixing matrix  $\mathbf{W}^{ME}$  in Equation (5) (resp.  $\mathbf{W}^{UR}$  in Equation (7)) can be recovered from observations of  $[U; Y]$  (resp.  $X$ ) up to permutation and scaling of its columns.*

Separability assumption states that for every observed mixture, the independent exogenous noise terms pertaining to this mixture can be separated, i.e., the mixing matrix can be recovered up to permutation and scaling of its columns. An example of a setting where this assumption holds is when all exogenous noises are non-Gaussian. In this case, if the model satisfies the requirement in [7, Theorem 1] (SEM-ME always does), overcomplete Independent Component Analysis (ICA) can be used to recover the mixing matrix up to permutation and scaling of its columns. Another

example where separability assumption is satisfied is the setup in which the noise terms are piecewise constant functionals satisfying a set of mild conditions [2]. On the other hand, an example where this assumption is violated is when all exogenous noise terms have Gaussian distributions. In this case, the mixing matrix can only be recovered up to an orthogonal transformation.

### 3 Mapping between the weighted graphs of the models for identifiability

A key observation in this work is that there exists a mapping between the weighted causal diagrams of the introduced SEM-ME and SEM-UR, which leads to the corresponding mixing matrices  $\mathbf{W}^{ME}$  and  $\mathbf{W}^{UR}$  being transposes of one another.

Define the mapping  $\varphi$  from the set of weighted causal diagrams of linear SEM-URs, denoted by  $\mathcal{M}^{UR}$ , to the set of weighted causal diagrams of canonical linear SEM-MEs, denoted by  $\mathcal{M}^{ME}$ , where for each diagram  $M \in \mathcal{M}^{UR}$ ,  $\varphi(M) \in \mathcal{M}^{ME}$  is constructed as follows: (a) Replace each latent variable in  $M$  with a  $Z$  variable. (b) Replace each observed root variable in  $M$  with a  $Y$  variable. (c) Replace the rest of the observed variables in  $M$  with either  $Z$  or  $Y$  variables. (d) Reverse all the edges in  $M$ . Note that  $\varphi(M)$  encompasses a set of models, corresponding to the possible choices in step (c).

Similarly define the mapping  $\phi$  from the set  $\mathcal{M}^{ME}$  to the set  $\mathcal{M}^{UR}$ , where for each diagram  $M' \in \mathcal{M}^{ME}$ ,  $\phi(M') \in \mathcal{M}^{UR}$  is constructed as follows. (a) Replace each u-leaf variable in  $M'$  with a latent variable. (b) Replace the rest of the variables in  $M'$  with observed variables. (c) Reverse all the edges in  $M'$ . Note that from the definition of the two mappings, for any given  $M \in \mathcal{M}^{UR}$ ,  $M = \phi(\varphi(M))$ . For any given  $M' \in \mathcal{M}^{ME}$ ,  $M' \in \varphi(\phi(M'))$ .

**Theorem 1** *Let  $M \in \mathcal{M}^{UR}$  with mixing matrix  $\mathbf{W}^{UR}(M)$  and  $M'$  be a corresponding element in  $\mathcal{M}^{ME}$  with mixing matrix  $\mathbf{W}^{ME}(M')$ , where  $M' \in \varphi(M)$  and  $M = \phi(M')$ . Then there exist a permutation of the columns of  $\mathbf{W}^{UR}(M)$ , denoted by  $\tilde{\mathbf{W}}^{UR}(M)$ , and a permutation of the columns of  $\mathbf{W}^{ME}(M')$ , denoted by  $\tilde{\mathbf{W}}^{ME}(M')$ , which satisfy  $\tilde{\mathbf{W}}^{ME}(M') = (\tilde{\mathbf{W}}^{UR}(M))^T$ .*

The proofs of all the results are provided in the Appendix. Note that as it can be seen from the proof of Theorem 1, whether the u-leaf variables, that are non-leaf in the SEM-ME, are observed or not does not change the corresponding mixing matrix.

**Remark 2** *The mapping introduced here is between a weighted diagram in SEM-UR and a set of weighted diagrams in SEM-ME. The elements of the set in fact correspond to different settings of the non-leaf underlying variables being observed or not. Note that in most applications, it is clear to the researcher whether an underlying variable is observed or measured with error. Therefore, only one element of the set is relevant to the application and the set reduces to a single element. Consequently, in our identifiability results, without loss of generality, we assume the set is a singleton.*

Theorem 1 implies that under separability assumption, any identifiability result based on the mixing matrix for one model is applicable to the other model, by reversing all edges. This allows us to study the problem of causal discovery of these two models simultaneously.

**Example 1** *Consider the linear SEM-UR in Figure 1(a) comprised of three observed and one latent variable (denoted by a single circle). The corresponding linear SEM-ME under the mapping  $\varphi$  is shown in Figure 1(b). Specifically, (i) the latent variable  $H$  is mapped to the u-leaf variable  $Z_L$  (denoted by a double circle); (ii) the observed root  $X_1$  is mapped to the observed underlying variable  $Y_1$ ; and (iii) observed variables  $X_2$  and  $X_3$  could be mapped to either observed or unobserved underlying variables; hence the UR graph will be mapped to a set of 4 graphs in the ME model. The mixing matrices for both models are shown in Figure 1. It can be readily seen that there exists a permutation of the columns of  $\mathbf{W}^{UR}$ , which is equal to the transpose of  $\mathbf{W}^{ME}$ .*

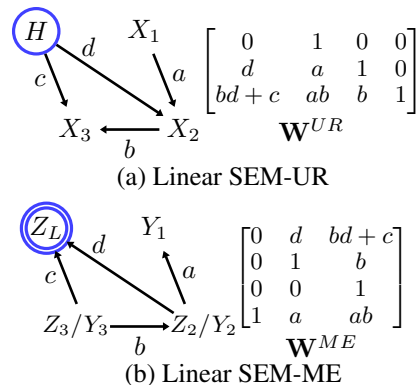

Figure 1: Example explaining the mapping.

### 4 Identifiability of models

In this section, we study the extent of identifiability of linear SEM-ME and SEM-UR under the separability assumption. We consider both a weaker notion of structure identification, where only

the graph structure of the model is obtained, and a stronger notion of model identification where, in addition to the graph structure, model parameters are recovered as well. In Section 4.1, we propose SEM-ME and SEM-UR faithfulness assumptions, which consist of two parts, the first of which is identical to the conventional faithfulness in linear causal models. We first discuss model identifiability under conventional faithfulness (i.e., the first part of our assumptions), which can be characterized by *ancestral ordered grouping* (AOG) of the variables, explained in Section 4.2. Next, under both parts of our proposed faithfulness assumptions, the extent of identifiability can be characterized by *direct ordered grouping* (DOG) of the variables, explained in Section 4.3. This leads to a subsequent result on structure identifiability for SEM-UR. In Section 4.4, we show that the DOG characterization possesses a sparsity property, which can be used to construct recovery algorithms for both models.

#### 4.1 Faithfulness assumption

**Assumption 2 (SEM-ME faithfulness)** (a) *The total causal effect of any underlying variable on its descendant is not equal to zero.* (b) *For each variable  $V$  in a SEM-ME, the causal effect of parents of  $V$  on  $V$  cannot be replicated by fewer or equal variables due to fine tuning of the parameters.* (See Appendix B.1 for the formal statement.)

**Assumption 3 (SEM-UR faithfulness)** (a) *The total causal effect of any observed or latent variable on its descendant is not equal to zero.* (b) *For each variable  $V$  in a SEM-UR, the causal effect of  $V$  on children of  $V$  cannot be replicated by fewer or equal variables due to fine tuning of the parameters.* (See Appendix B.1 for the formal statement.)

Assumptions 2(a) and 3(a) are identical to conventional faithfulness in linear causal models. They require that when multiple causal paths exist from any (observed or unobserved) variable to its descendants, their combined effect (i.e., sum of products of path coefficients) is not equal to zero, see [24]. Assumptions 2(b) and 3(b) prevent certain path cancellation or parameter proportionality. Importantly, Assumptions 2 and 3 are violated with probability zero if all model coefficients are drawn randomly and independently from continuous distributions; see Appendix B.3 for the proof. As an example for violation of Assumption 2(b), consider the linear SEM-ME generated by the graph in Figure 2(a), which satisfies Assumption 2(a). However, we can write  $Z_4$  as  $(b + c)Z_2 + N_{Z_3}$ , which is caused by the path cancellation of the triangle  $(Z_1, Z_3, Z_4)$ . This means that the causal effect of  $Z_1$  and  $Z_2$  on  $Z_4$  can be summarized by  $Z_2$  alone. Therefore, the model violates Assumption 2(b). Lastly, Assumption 3 is strictly weaker than bottleneck faithfulness in [1]; see Appendix B.4 for the proof. Please refer to Appendix B for more discussion about our faithfulness assumption and Appendix D for a detailed comparison between our identifiability results and the results in [1].

#### 4.2 Ancestral ordered grouping

We first study the extent of identifiability of the models only under conventional faithfulness, i.e., Assumptions 2(a) and 3(a).

##### Definition 4 (Ancestral ordered grouping (AOG))

The AOG of a SEM-ME (resp. SEM-UR) is a partition of  $\mathcal{Z} \cup \mathcal{Y}$  (resp.  $\mathcal{H} \cup \mathcal{X}$ ) into distinct sets. This partition is described as follows: (1) Assign each `nu-leaf` node (resp. observed node) to a distinct group. (2) SEM-ME: For each `u-leaf` node  $Z_j \in \mathcal{Z}$ , if there exists one parent  $V_i$  such that  $Z_j$  has no other parents, or all other parents of  $Z_j$  are also ancestors of  $V_i$ , assign  $Z_j$  to the same group as  $V_i$ . Otherwise, assign  $Z_j$  to a separate group (with no `nu-leaf` node). (2) SEM-UR: For each latent variable  $H_j$ , if there exists one child  $X_i$  such that  $H_j$  has no other children, or all other children of  $H_j$  are also descendants of  $X_i$ , assign  $H_j$  to the same group as  $X_i$ . Otherwise, assign  $H_j$  to a separate group (with no observed variable).

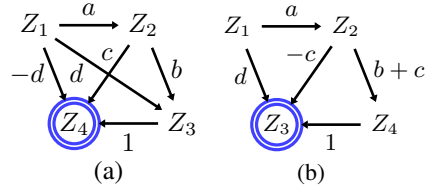

$$\begin{bmatrix} Z_1 \\ Z_2 \\ Z_3 \\ Z_4 \end{bmatrix} = \begin{bmatrix} 1 & 0 & 0 \\ a & 1 & 0 \\ ab + d & b & 1 \\ a(b + c) & b + c & 1 \end{bmatrix} \begin{bmatrix} N_{Z_1} \\ N_{Z_2} \\ N_{Z_3} \end{bmatrix}$$

Figure 2: Example explaining AOG and SEM-ME faithfulness assumption.

**Definition 5 (AOG equivalence class)** The AOG equivalence class of a linear SEM-ME (resp. SEM-UR) is a set of models where the elements of this set all have the same mixing matrix (up to permutation and scaling) and same ancestral ordered groups.

For example, the two models represented by the graphs in Figure 2 have the same mixing matrix and ancestral ordered groups. The elements of an AOG equivalence class possess the following property.

**Proposition 1** Models in the same AOG equivalence class have the same causal order among the groups, but not necessarily all the same edges across the groups.

The AOG characterization is a refined version of the original ordered grouping proposed in [29], where no variables in later groups cause variables in earlier groups. Yet, the grouping introduced in that work is order dependent and hence in general not unique. Moreover, it does not always characterize the extent of identifiability. Our AOG characterization also uses a similar idea as the learning approach in [19]; however, that work allows for latent variables which have parents and in general does not recover the full structure. Note that the AOG can be recovered based on the support of the mixing matrix under Assumption 2(a) (or 3(a)). Please refer to Appendix A for more details.

According to Definition 4, there is at most one `nu-leaf` node in each ancestral ordered group of a SEM-ME. Furthermore, each `u-leaf` node  $Z_j$  is assigned to the ancestral ordered group of at most one of its parents: Following the true causal order among `nu-leaf` nodes, only the last parent of  $Z_j$  may have the same ancestor set. Hence, if a group has more than one node, then there must be exactly one `nu-leaf` node, and the rest of the nodes are `u-leaf` nodes which are children of this node. This concludes that the induced structure on each ancestral ordered group is a star graph. Similar property holds for SEM-UR. Define the center of the ancestral ordered group as the `nu-leaf` node (resp. the observed node), or the `u-leaf` node (resp. latent node) if the group is of size one. The following result illustrates that fixing the center of the ancestral ordered groups for SEM-ME, and fixing the exogenous noise term of the center of the ancestral ordered groups as well as the choice of scaling and permutation of the columns of  $\mathbf{B}$  for SEM-UR, leads to unique identification of the models.

**Proposition 2** (i) *Models in an AOG equivalence class of a SEM-ME can be identified by the choice of the centers of the groups. That is, for a given choice of the centers, there is only one corresponding model.* (ii) *Models in an AOG equivalence class of a SEM-UR can be identified (up to the permutation and scaling of the columns of  $\mathbf{B}$  in (4)) by the choice of the exogenous noise terms associated to the centers of the groups. That is, for a given assignment of the exogenous noise terms, all corresponding models have the same  $\mathbf{A}$  in (4), and have the same  $\mathbf{B}$  up to permutation and scaling of the columns.*

Equipped with Proposition 2, we are now ready to state our identifiability results for SEM-ME and SEM-UR under Assumptions 2(a) and 3(a), respectively.

**Theorem 2** *Under Assumptions 1 and 2(a) (resp. 3(a)), the linear SEM-ME (resp. SEM-UR) can be identified up to its AOG equivalence class.*

**Corollary 1** (i) *Denote the AOG of a linear SEM-ME (resp. SEM-UR) as  $\{\mathcal{G}^{(g)}\}_{g \in [g_k]}$ , where  $g_k$  is the number of ancestral ordered groups. The size of the AOG equivalence class, described in Theorem 2, is equal to  $\prod_{g \in [g_k]} |\mathcal{G}^{(g)}|$ .* (ii) *Under Assumptions 1 and 2(a), a linear SEM-ME can be uniquely identified if and only if no `u-leaf` node has precisely the same ancestors as any `nu-leaf` node.* (iii) *Under Assumptions 1 and 3(a), a linear SEM-UR can be identified up to the permutation and scaling of the columns of  $\mathbf{B}$  if and only if no latent variable has precisely the same descendants as any observed variable.*

As stated in Theorem 2, in general, the edges across the groups cannot all be discovered and the centers of the groups (or their corresponding exogenous noise terms) are not identifiable. This is due to the fact that when only Assumption 2(a) holds, certain path cancellation or parameter proportionality in the model can occur. This is illustrated in the following example.

**Example 2** *Consider the SEM-ME generated by causal graph shown in Figure 2(a). The AOG is  $\{\{Z_1\}, \{Z_2\}, \{Z_3, Z_4\}\}$ . Because either  $Z_3$  or  $Z_4$  can be the center of the last group, the AOG equivalence class includes the ground-truth and the model represented by Figure 2(b). Since both models have the same mixing matrix, an identification algorithm merely based on the mixing matrix and Assumption 2(a) cannot distinguish these two models. Note that not only can we not learn the direction of the edge in group  $\{Z_3, Z_4\}$ , but also the existence of some of the edge across groups, such as  $Z_1 \rightarrow Z_4$ , cannot be established in the ground-truth because Assumption 2(b) is violated.*

### 4.3 Identifiability of the model up to equivalence classes

Under Assumptions 1 and 2 (resp. 3), the extent of identifiability of a SEM-ME (resp. SEM-UR) can be characterized by the direct ordered grouping defined in Definition 6 below. We first present two conditions that are used to implement the DOG. We then give the formal definition of DOG. In the following, we use  $Ch(V)$  to denote the set of children of variable  $V$  in the causal diagram.

**Condition 1 (SEM-ME edge identifiability)** *For a given edge from an `nu-leaf` node  $V_i$  to a `u-leaf` node  $Z_l$ , at least one of the following two conditions is satisfied: (a)  $Pa(Z_l) \setminus \{V_i\}$  is not a subset of  $Pa(V_i)$ . That is, there exists another parent  $V_j$  of  $Z_l$ , which is not a parent of  $V_i$ . (b)  $Pa(Z_l)$  is not a subset of  $\cap_{V_k \in Ch(V_i) \setminus \{Z_l\}} Pa(V_k)$ . That is, there exists a child  $V_k$  of  $V_i$  and a parent  $V_j$  of  $Z_l$  such that  $V_j$  is not a parent of  $V_k$ .*

**Condition 2 (SEM-UR edge identifiability)** For a given edge from a latent variable  $H_l$  to an observed variable  $X_i$ , at least one of the following two conditions is satisfied: (a)  $Ch(H_l) \setminus \{X_i\}$  is not a subset of  $Ch(X_i)$ . That is, there exists another observed child  $X_j$  of  $H_l$ , which is not a child of  $X_i$ . (b)  $Ch(H_l)$  is not a subset of  $\cap_{X_k \in Pa(X_i) \setminus \{H_l\}} Ch(X_k)$ . That is, there exists an observed (or latent) parent  $X_k$  (or  $H_k$ ) of  $X_i$  and a child  $X_j$  of  $H_l$  such that  $X_j$  is not a child of  $X_k$  (or  $H_k$ ).

Figure 3(b) demonstrates an example of a graph structure which satisfies Assumption 2 while containing an edge which violates Condition 1. Condition 1 is an equivalent formulation of the conditions for unique identifiability derived in [29]. In that work, Zhang et al. proved that a linear SEM-ME can be uniquely recovered if Condition 1 is satisfied for every edge from an `nu-leaf` node to a `u-leaf` node.<sup>3</sup> They also conjectured that this condition is necessary for identifiability. We prove their conjecture here under a slightly different faithfulness assumption. Furthermore, we demonstrate that the conditions can be used to characterize an equivalence class of the models which characterizes the extent of identifiability under Assumptions 1 and 2; the same assertion holds for linear SEM-UR. This characterization is done based on the notion of direct ordered grouping, defined as follows.

**Definition 6 (Direct ordered grouping (DOG))** The *DOG* of a linear SEM-ME (resp. SEM-UR) is a partition of  $\mathcal{Z} \cup \mathcal{Y}$  (resp.  $\mathcal{H} \cup \mathcal{X}$ ) into distinct sets. This partition is described as follows:

- (1) Assign each `nu-leaf` node (resp. observed node) to a distinct ordered group.
- (2) SEM-ME: For each `u-leaf` node  $Z_j \in \mathcal{Z}$ , if there exists one parent  $V_i$  such that the edge from  $V_i$  to  $Z_j$  violates Condition 1, assign  $Z_j$  to the same ordered group as  $V_i$ . Otherwise, assign  $Z_j$  to a separate ordered group (with no `nu-leaf` node).
- (2) SEM-UR: For each latent variable  $H_j$ , if there exists one child  $X_i$  such that the edge from  $H_j$  to  $X_i$  violates Condition 2, assign  $H_j$  to the same ordered group as  $X_i$ . Otherwise, assign  $H_j$  to a separate ordered group (with no observed variable).

**Definition 7 (DOG equivalence class)** The *DOG equivalence class* of a linear SEM-ME (resp. SEM-UR) is a set of models where the elements of this set all have the same mixing matrix (up to permutation and scaling) and same direct ordered groups.

For example, the two models represented by the graphs in Figure 2 have the same mixing matrix, but different direct ordered groups. We have the following property regarding elements of an *DOG* equivalence class.

**Proposition 3** Models in the same *DOG* equivalence class have the same edges across the groups.

The counterpart of Proposition 2 holds for the case of direct ordered groups as well and we avoid repeating it. Based on that counterpart, we have the following result regarding identifiability of linear SEM-ME and SEM-UR under Assumptions 2 and 3, respectively.

**Theorem 3** Under Assumptions 1 and 2 (resp. 3), the linear SEM-ME (resp. SEM-UR) can be identified up to its *DOG* equivalence class.

Theorem 3 states that we can learn the structure among the groups, but the center of the group (or the noise term corresponding to it) will remain unidentified. Unlike the case of the *AOG* equivalence class, all the edges across the groups will be identified. That is, the choice of center does not change the edges across groups in *DOG* equivalence class, while it may change the edges in *AOG* equivalence class. Further, the sizes of the direct ordered groups are smaller than the sizes of the ancestral ordered groups. As an example, for the model shown in Figure 2(b), all direct ordered groups are of size one.

**Corollary 2** (i) The counterpart of Corollary 1(i) is true for the case of *DOG* as well and we do not repeat it here. (ii) Under Assumptions 1 and 2, a SEM-ME can be uniquely identified if and only if for every edge from an `nu-leaf` node to a `u-leaf` node, Condition 1 is satisfied. (iii) Under Assumptions 1 and 3, a SEM-UR can be identified up to the permutation and scaling of the columns of  $\mathbf{B}$  if and only if for every edge from a latent variable to an observed variable, Condition 2 is satisfied.

**Identifiability of the structure of the SEM-UR.** As shown in Theorem 3, for a SEM-UR, the only undetermined part in the *DOG* equivalence class pertains to the assignment of the exogenous noises and coefficients, but the structure is the same. Consequently, if only the identification of the structure without weights is of interest, Assumptions 1 and 3 are sufficient. See Figure 3(a) for an example of two *DOG* equivalent SEM-URs. This identifiability result is summarized in the following corollary.

**Corollary 3** Under Assumptions 1 and 3, the structure of a SEM-UR can be uniquely recovered.

<sup>3</sup>Note that in their model, Zhang et al. assumed that all the underlying variables are unobserved.



#### 4.4 Recovery algorithm

We note that our faithfulness assumption implies that the ground-truth model has strictly fewer edges than any model that has the same mixing matrix and satisfies conventional faithfulness (i.e., in the AOG equivalence class) but does not belong to the DOG equivalence class. This property can be leveraged to recover the ground-truth model or a member of its DOG equivalence class.

**Proposition 4** *Suppose a SEM-ME (resp. SEM-UR) satisfies Assumptions 1 and 2 (resp. 3). Any model that belongs to the same AOG equivalence class but does not belong to the same DOG equivalence class has strictly more edges than any member in the DOG equivalence class.*

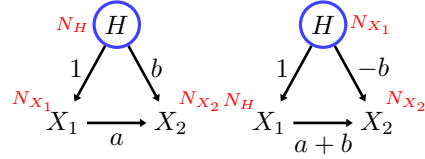

(a) Equivalence class of a SEM-UR

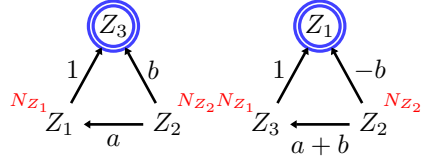

(b) Equivalence class of a SEM-ME

Figure 3: DOG Equivalence classes.

The steps of our recovery algorithm are as follows: (1)

Recover the mixing matrix  $\mathbf{W}^{ME}$  (resp.  $\mathbf{W}^{UR}$ ) from observational data. (2) Return the AOG of the true model by comparing the support across different rows/columns in  $\mathbf{W}^{ME}$  (resp.  $\mathbf{W}^{UR}$ ). See Appendix A.2 for details and pseudo-code for AOG recovery. (3) For all possible choices of the center (resp. noise term associated to the center) of each ancestral ordered group, find a choice that leads to the graph with fewest number of edges in the recovery output (see the proof of Lemma 1).

## 5 Simulations

We evaluated the performance of our recovery algorithm on randomly generated linear SEM-MEs and SEM-URs with different number of variables.<sup>4</sup> We considered two cases: (1) when a noisy version of the mixing matrix is given, where the noise is Gaussian with different choices of variance denoted by  $d^2$ , and (2) when synthetic data comes from a linear generating model with non-Gaussian noises with different sample sizes, and the mixing matrix needs to be estimated. We used the Reconstruction ICA algorithm [14] as our overcomplete ICA method. For Case (1), we compared our recovery method (which we refer to as DOG) with an approach based on AOG equivalence class (similar to the learning method in [19]). In addition to the AOG method, for Case (2), we compared our method with ICA-LiNGAM [21]. Note that the ICA-LiNGAM method is not designed for systems with latent variables, but benefits from strong performance for recovering the mixing matrix in causally sufficient settings. The goal of this comparison was to demonstrate the necessity of using methods designed specifically to handle latent variables.

We compared the recovery of the adjacency matrix to the ground-truth, where we used normalized structural Hamming distance (SHD/Edge) and F1 score as our performance metrics. Our results for Cases (1) and (2) are shown in top and bottom two rows in Figure 4, respectively. As seen in these figures, our recovery algorithm outperforms recovery algorithm based on AOG. In particular, our method recovers the structure in SEM-UR model, and can recover part of the structure in SEM-ME that is shared among DOG equivalence classes. Moreover, both methods outperform ICA-LiNGAM. Please refer to Appendix E for additional results and analysis.

## 6 Conclusion and Discussion

In real-world applications, we do not observe the exact value of all relevant variables; the measurements of some variables are prone to errors, or some other variables cannot be observed altogether. For example, in neuroscience and genomics, measured brain signals obtained by functional magnetic resonance imaging (fMRI) or the measured gene expression using RNA sequencing usually contain errors through the measurement process [18, 29]. Other examples include responses to psychometric questionnaires where the questions represent noisy views of various traits [1, 20], and returns in stock market, where they may be confounded by several unmeasured economic and political factors [1].

In this work, we considered the problem of causal discovery in setups with such challenges, particularly under two settings: (1) in the presence of measurement error, and (2) with unobserved parentless causes. Unlike previous work, our proposed SEM-ME allows for applications containing a mixture of variables measured exactly (without error) or measured with error. We demonstrated a mapping between these two models that preserves their mixing matrix. Based on this mapping, we derived identifiability results for both models under different faithfulness assumptions, and proposed

<sup>4</sup>Our code is available at: <https://github.com/Yuqin-Yang/SEM-ME-UR>.

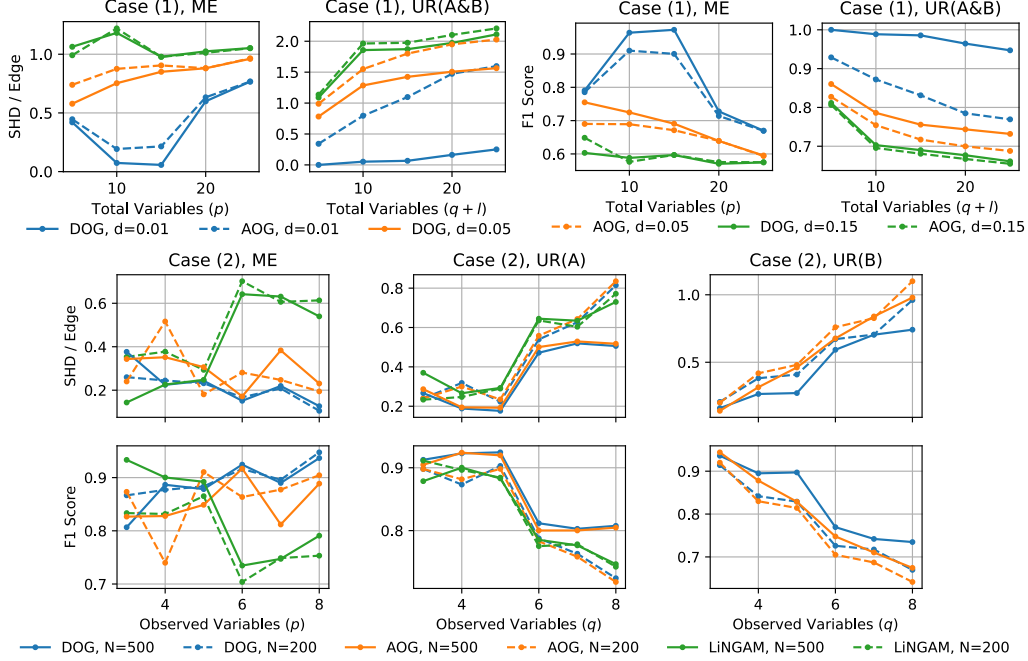

Figure 4: Simulation results for Case (1), noisy mixing matrix (with noise variance  $d^2$ ), and Case (2), raw observational data (with sample size  $N \cdot p$  for ME and  $N \cdot q$  for UR). In Case (1), x-axis corresponds to  $|\mathcal{Y} \cup \mathcal{Z}|$  in SEM-ME, and  $|\mathcal{H} \cup \mathcal{X}|$  in SEM-UR. In Case (2), x-axis corresponds to  $|\mathcal{Y} \cup \mathcal{U}|$  in SEM-ME, and  $|\mathcal{X}|$  in SEM-UR. We compare the recovery of both adjacency matrices  $\mathbf{A}$  and  $\mathbf{B}$  (cf. Equation (4)) for SEM-UR. Lower SHD/Edge value and higher F1 score indicate better performances.

structure learning algorithms. Our results further implied conditions for unique identifiability of the structure in SEM-UR. These conditions do not pose any restrictions on the graphical model, and hence significantly relax the existing graphical conditions in the literature [19, 1, 25, 4].

Our results have several implications in the literature of causal discovery including the following: The mapping proposed in our work between linear SEM-ME and SEM-UR allows us to translate identifiability results for one model to the other. We note that linear SEM-UR has been widely studied in the literature, while only a few works considered linear SEM-ME. Therefore, an important implication of our work is that the introduced mapping can be utilized to fill the gaps for the less studied model. Another important implication of our result is that it can be used for evaluating new algorithms: We showed that under two different faithfulness assumptions, the model can only be identified up to AOG and DOG equivalence classes. This result provides the extent of identifiability, and can serve as a basis for characterizing theoretical guarantees such as consistency of new algorithms. Finally, we showed in Proposition 4 that under our faithfulness assumptions, the true generating model is always sparser than any other model in the same AOG equivalence class (of the ground-truth) but does not belong to the DOG equivalence class. This serves as a ground for positing sparsity assumptions that appear frequently in the literature without rigorous justification.

Similar to other causal discovery methods which are based on the mixing matrix, the performance of our proposed recovery algorithms relies on the accuracy of the utilized mixing matrix estimation approach. Hence, the recovered structure should be interpreted with caution if the mixing matrix estimation approach is unreliable. Devising more accurate approaches for estimating the mixing matrix, as well as extending the method proposed in this work to non-linear models are important directions of future research.

## Acknowledgments and Disclosure of Funding

Negar Kiyavash’s research was in part supported by the Swiss National Science Foundation under NCCR Automation, grant agreement 51NF40\_180545 and Swiss SNF project 200021\_204355 /1. Kun Zhang was partially supported by NIH under Contract R01HL159805, by the NSF-Convergence Accelerator Track-D award #2134901, by a grant from Apple Inc., and by a grant from KDDI Research Inc. Ilya Shpitser was supported by grants ONR N00014-21-1-2820, NSF 2040804, NSF CAREER 1942239 and NIH R01 AI127271-01A1.

## References

- [1] Jeffrey Adams, Niels Hansen, and Kun Zhang. Identification of partially observed linear causal models: Graphical conditions for the non-gaussian and heterogeneous cases. *Advances in Neural Information Processing Systems*, 34, 2021.
- [2] Merle Behr, Chris Holmes, Axel Munk, et al. Multiscale blind source separation. *The Annals of Statistics*, 46(2):711–744, 2018.
- [3] Ruichu Cai, Feng Xie, Clark Glymour, Zhifeng Hao, and Kun Zhang. Triad constraints for learning causal structure of latent variables. In *Advances in Neural Information Processing Systems (NeurIPS)*, 2019.
- [4] Wei Chen, Kun Zhang, Ruichu Cai, Biwei Huang, Joseph Ramsey, Zhifeng Hao, and Clark Glymour. Fritl: A hybrid method for causal discovery in the presence of latent confounders. *arXiv preprint arXiv:2103.14238*, 2021.
- [5] Guilherme Duarte, Noam Finkelstein, Dean Knox, Jonathan Mummolo, and Ilya Shpitser. An automated approach to causal inference in discrete settings. *arXiv preprint arXiv:2109.13471*, 2021.
- [6] Bradley Efron and Robert J Tibshirani. *An introduction to the bootstrap*. CRC press, 1994.
- [7] Jan Eriksson and Visa Koivunen. Identifiability, separability, and uniqueness of linear ICA models. *IEEE signal processing letters*, 11(7):601–604, 2004.
- [8] Robin J Evans. Graphs for margins of bayesian networks. *Scandinavian Journal of Statistics*, 43(3):625–648, 2016.
- [9] Robin J Evans. Margins of discrete bayesian networks. *The Annals of Statistics*, 46(6A):2623–2656, 2018.
- [10] Clark Glymour, Kun Zhang, and Peter Spirtes. Review of causal discovery methods based on graphical models. *Frontiers in genetics*, 10:524, 2019.
- [11] Yoni Halpern, Steven Horng, and David Sontag. Anchored discrete factor analysis. *arXiv preprint arXiv:1511.03299*, 2015.
- [12] Patrik O Hoyer, Shohei Shimizu, Antti J Kerminen, and Markus Palviainen. Estimation of causal effects using linear non-gaussian causal models with hidden variables. *International Journal of Approximate Reasoning*, 49(2):362–378, 2008.
- [13] Manabu Kuroki and Judea Pearl. Measurement bias and effect restoration in causal inference. *Biometrika*, 101(2):423–437, 2014.
- [14] Quoc V Le, Alexandre Karpenko, Jiquan Ngiam, and Andrew Y Ng. Ica with reconstruction cost for efficient overcomplete feature learning. In *Advances in neural information processing systems*, pages 1017–1025, 2011.
- [15] Chris Meek. Strong-completeness and faithfulness in belief networks. In *Proceedings of the Eleventh Conference on Uncertainty in Artificial Intelligence*. Citeseer, 1995.
- [16] Judea Pearl. *Causality*. Cambridge university press, 2009.
- [17] Judea Pearl. On measurement bias in causal inference. *arXiv preprint arXiv:1203.3504*, 2012.
- [18] Basil Saeed, Anastasiya Belyaeva, Yuhao Wang, and Caroline Uhler. Anchored causal inference in the presence of measurement error. In *Conference on uncertainty in artificial intelligence*, pages 619–628. PMLR, 2020.
- [19] Saber Salehkaleybar, AmirEmad Ghassami, Negar Kiyavash, and Kun Zhang. Learning linear non-gaussian causal models in the presence of latent variables. *Journal of Machine Learning Research*, 21(39):1–24, 2020.
- [20] Richard Scheines and Joseph Ramsey. Measurement error and causal discovery. In *CEUR workshop proceedings*, volume 1792, page 1. NIH Public Access, 2016.
- [21] Shohei Shimizu, Patrik O Hoyer, Aapo Hyvärinen, and Antti Kerminen. A linear non-gaussian acyclic model for causal discovery. *Journal of Machine Learning Research*, 7(Oct):2003–2030, 2006.
- [22] Shohei Shimizu, Takanori Inazumi, Yasuhiro Sogawa, Aapo Hyvärinen, Yoshinobu Kawahara, Takashi Washio, Patrik O Hoyer, and Kenneth Bollen. DirectLiNGAM: A direct method for learning a linear non-gaussian structural equation model. *Journal of Machine Learning Research*, 12(Apr):1225–1248, 2011.

- [23] R. Silva, R. Scheines, C. Glymour, and P. Spirtes. Learning the structure of linear latent variable models. *Journal of Machine Learning Research*, 7:191–246, 2006.
- [24] Peter Spirtes, Clark N Glymour, Richard Scheines, and David Heckerman. *Causation, prediction, and search*. MIT press, 2000.
- [25] Y Samuel Wang and Mathias Drton. Causal discovery with unobserved confounding and non-gaussian data. *arXiv preprint arXiv:2007.11131*, 2020.
- [26] F. Xie, R. Cai, B. Huang, C. Glymour, Z. Hao, and K. Zhang. Generalized independent noise condition for estimating linear non-gaussian latent variable causal graphs. In *Neural Information Processing Systems (NeurIPS)*, 2020.
- [27] Feng Xie, Biwei Huang, Zhengming Chen, Yangbo He, Zhi Geng, and Kun Zhang. Identification of linear non-Gaussian latent hierarchical structure. In *Proceedings of the 39th International Conference on Machine Learning*, volume 162 of *Proceedings of Machine Learning Research*, pages 24370–24387. PMLR, 17–23 Jul 2022.
- [28] Yuqin Yang, Mohamed Nafea, AmirEmad Ghassami, and Negar Kiyavash. Causal discovery in linear structural causal models with deterministic relations. In *First Conference on Causal Learning and Reasoning*, 2022.
- [29] Kun Zhang, Mingming Gong, Joseph D Ramsey, Kayhan Batmanghelich, Peter Spirtes, and Clark Glymour. Causal discovery with linear non-gaussian models under measurement error: Structural identifiability results. In *UAI*, pages 1063–1072, 2018.

## Checklist

1. For all authors...
  - (a) Do the main claims made in the abstract and introduction accurately reflect the paper’s contributions and scope? [Yes]
  - (b) Did you describe the limitations of your work? [Yes] Please refer to Section 6.
  - (c) Did you discuss any potential negative societal impacts of your work? [No] We believe that causal structure learning from observational data avoids potential negative societal impacts in causal discovery that might be associated with conducting randomized experiments.
  - (d) Have you read the ethics review guidelines and ensured that your paper conforms to them? [Yes]
2. If you are including theoretical results...
  - (a) Did you state the full set of assumptions of all theoretical results? [Yes] Assumptions 1 and 2 (resp. 3) are our identifiability assumptions for linear SEM-ME (resp. SEM-UR).
  - (b) Did you include complete proofs of all theoretical results? [Yes] Please refer to Appendix C.
3. If you ran experiments...
  - (a) Did you include the code, data, and instructions needed to reproduce the main experimental results (either in the supplemental material or as a URL)? [Yes] Please refer to Appendix E for instructions. Our code is available at: <https://github.com/Yuqin-Yang/SEM-ME-UR>.
  - (b) Did you specify all the training details (e.g., data splits, hyperparameters, how they were chosen)? [Yes] This is explained in detail in Appendix E.
  - (c) Did you report error bars (e.g., with respect to the random seed after running experiments multiple times)? [Yes] Please refer to Appendix E.4.
  - (d) Did you include the total amount of compute and the type of resources used (e.g., type of GPUs, internal cluster, or cloud provider)? [No] Simulations are conducted using the CPU of a MacBook laptop.
4. If you are using existing assets (e.g., code, data, models) or curating/releasing new assets...
  - (a) If your work uses existing assets, did you cite the creators? [Yes] We cited the original paper of the baseline algorithm.
  - (b) Did you mention the license of the assets? [N/A] Our simulations are conducted on synthetic data only.
  - (c) Did you include any new assets either in the supplemental material or as a URL? [N/A]
  - (d) Did you discuss whether and how consent was obtained from people whose data you’re using/curating? [N/A]
  - (e) Did you discuss whether the data you are using/curating contains personally identifiable information or offensive content? [N/A]

5. If you used crowdsourcing or conducted research with human subjects...
- (a) Did you include the full text of instructions given to participants and screenshots, if applicable? [N/A]
  - (b) Did you describe any potential participant risks, with links to Institutional Review Board (IRB) approvals, if applicable? [N/A]
  - (c) Did you include the estimated hourly wage paid to participants and the total amount spent on participant compensation? [N/A]

# Causal Discovery in Linear Latent Variable Models Subject to Measurement Error

## Supplementary Material

### A Further discussion on ancestral ordered grouping

First, we compare our ancestral ordered grouping (AOG) in Definition 4 with the ordered grouping proposed in [29]. Next, we compare our AOG to the equivalence classes for identifiability of a linear SEM with latent variables under conventional faithfulness, proposed in [19]. Finally, we present the details of our AOG recovery algorithm.

#### A.1 Comparison of AOG to previous work

In the following, we present an equivalent definition of the ordered grouping proposed in [29], which is closer in spirit to our AOG definition. As we mentioned earlier, the model proposed in [29] assumes that all the underlying variables are measured with error (unobserved), i.e.,  $\mathcal{Y}$  in Equation (1) is an empty set. Subsequently, a `u-leaf` node is an unobserved underlying variable with no children in  $\mathcal{Z}$  and an `nu-leaf` node is an unobserved underlying variable with at least one child in  $\mathcal{Z}$ .

**Definition 8 (Ordered group decomposition (OGD) [29])** *The ordered group decomposition of a linear SEM-ME is a partition of  $\mathcal{Z}$  into distinct sets. This partition is described as follows:*

- (1) *Select a causal order  $k$  among `nu-leaf` nodes in  $\mathcal{Z}$  that is consistent with the generating model. Assign each `nu-leaf` node to a distinct ordered group.*
- (2) *For each `u-leaf` node  $Z_j \in \mathcal{Z}$ , assign  $Z_j$  to the same group as its parent with the largest index in  $k$ .*

The ordered grouping by [29] depends on the selected causal order and hence might not be unique, since there can be more than one causal order consistent with the generating model. Subsequently, this ordered grouping does not permit characterizing the extent of identifiability under conventional faithfulness alone, i.e., the equivalence classes of the generating model in Theorem 2. In contrast, our AOG is a more refined grouping than Definition 8 and returns a unique partition that does not depend on the selection of the causal order. Further, our AOG characterizes the extent of identifiability under conventional faithfulness (cf. Theorem 2). The following example illustrates the difference between the ordered grouping in [29] and our AOG.

**Example 3** *Consider a collider structure over three underlying variables in a linear SEM-ME:  $Z_1 \rightarrow Z_3 \leftarrow Z_2$ , where  $Z_3$  is a `u-leaf` node. There are two possible causal orders that correspond to this structure, namely (1,2,3) and (1,3,2). Hence, based on the ordered grouping definition of [29], there are two possible corresponding partitions, namely,  $\{\{Z_1\}, \{Z_2, Z_3\}\}$  and  $\{\{Z_2\}, \{Z_1, Z_3\}\}$ . However, following our definition of AOG, i.e., Definition 4, the AOG is  $\{\{Z_1\}, \{Z_2\}, \{Z_3\}\}$ , which is a refined partition of either of the two partitions by [29]. Further, the AOG of the model can be recovered based on (the support of) the mixing matrix  $\mathbf{W}^{ME}$ :  $Z_3$  includes two noise terms, while  $Z_1$  and  $Z_2$  each includes one.*

Next, we show the connection between our AOG and the observed descendant sets in [19] proposed for a linear SEM with latent variables. The “observed descendant set” of a (latent or observed) variable  $V_i$  is defined as the set of all observed descendants of  $V_i$ , including  $V_i$  itself if it is observed. The following proposition states the equivalence of the two notions in a linear SEM-UR.

**Proposition 5** *In a linear SEM-UR, two variables are in the same ancestral ordered group if and only if they have the same observed descendant set.*

The authors of [19] showed that using “observed descendant sets”, the causal order among the observed variables can be identified under conventional faithfulness assumption (i.e., Assumption 3(a)). Further, the total causal effects among observed variables can be estimated. However, the model in [19] allows for latent variables which have parents (i.e., not roots) and in general, the full structure cannot be identified. In contrast, our AOG equivalence class characterization (Theorem 2) extends the result in [19]. Specifically, we can recover the causal order among the ancestral ordered groups, where each ancestral ordered group has at most one observed variable. Moreover, we can estimate the exact structure and the coefficients of every model in the AOG equivalence class.

---

**Algorithm 1:** Recovering ancestral ordered grouping in linear SEM-ME.

---

**Input:** Recovered mixing matrix  $\mathbf{W}^{ME}$ .

- 1 Calculate the number of non-zero entries in each row of  $\mathbf{W}^{ME}$ . Denote the vector of these numbers as  $\mathbf{n}$ , where each entry in  $\mathbf{n}$  corresponds to a row in  $\mathbf{W}^{ME}$ .
- 2 Initialize  $\tilde{\mathbf{W}} = \mathbf{W}^{ME}$ .
- 3 **while**  $\tilde{\mathbf{W}}$  is not empty **do**
- 4     Find a row in  $\tilde{\mathbf{W}}$  that contains only one non-zero entry, and has the smallest corresponding value in  $\mathbf{n}$ . If there are multiple such rows, randomly select one. Denote the selected row as  $\mathbf{w}$ , and its corresponding value in  $\mathbf{n}$  as  $n_0$ .
- 5     Consider the rows in  $\tilde{\mathbf{W}}$  with the same support as  $\mathbf{w}$  (including  $\mathbf{w}$  itself). Denote the set of variables that correspond to these rows as  $\mathcal{Z}_W$ .
- 6     Assign all variables in  $\mathcal{Z}_W$ , with the same corresponding value as  $n_0$  in  $\mathbf{n}$ , to a single ordered group.
- 7     Assign each of the remaining variables in  $\mathcal{Z}_W$  to a separate ordered group.
- 8     Remove from  $\tilde{\mathbf{W}}$  the rows corresponding to the variables in  $\mathcal{Z}_W$ , and the column containing the corresponding non-zero entries in these rows.

**Output:** AOG of the SEM-ME.

---

## A.2 AOG recovery algorithm

Based on Assumption 1, we can recover  $\mathbf{W}^{ME}$  (resp.  $\mathbf{W}^{UR}$ ) from the observed data. The following property can be implied from the definition of AOG, which shows that under conventional faithfulness assumption, we can identify the AOG of the model only based on the support of the mixing matrix.

**Proposition 6** (a) Under Assumption 2(a), two variables in a SEM-ME belong to the same ancestral ordered group if and only if the two rows in  $\mathbf{W}^{ME}$  corresponding to these variables have the same support. (b) Under Assumption 3(a), two variables in a SEM-UR belong to the same ancestral ordered group if and only if the two columns in  $\mathbf{W}^{UR}$  corresponding to the exogenous noise terms of these variables have the same support.

Equipped with this proposition, Algorithm 1 shows how to recover the AOG in Definition 4 from  $\mathbf{W}^{ME}$ . The Algorithm first randomly chooses a row in  $\mathbf{W}^{ME}$  with one non-zero entry and finds all other rows with the same support, and puts all the corresponding variables in a single ancestral ordered group. Next, it removes the selected rows and the column that contains the corresponding non-zero entry. In the remaining matrix, say  $\tilde{\mathbf{W}}$ , the Algorithm again chooses a row  $\mathbf{w}$  with one non-zero entry, but has the smallest number of non-zero entries in  $\mathbf{W}^{ME}$ . Then, it selects all other rows in  $\tilde{\mathbf{W}}$  with the same support and the same number of non-zero entries in  $\mathbf{W}^{ME}$ , as  $\mathbf{w}$ . The rows in  $\tilde{\mathbf{W}}$  with exactly one non-zero entry and having the same (fewest) number of non-zero entries in  $\mathbf{W}^{ME}$  correspond to an u-leaf node and its direct children (with the same support in  $\mathbf{W}^{ME}$ ), and hence they go together into the same group. The remaining rows with more non-zero entries in  $\mathbf{W}^{ME}$  are u-leaf nodes that go to separate distinct groups. Finally, this procedure is repeated until all variables are assigned to ancestral ordered groups.

Since Algorithm 1 is based on the mixing matrix, it follows from the constructed mapping in Theorem 1 that the same Algorithm can be applied to recover the AOG of a linear SEM-UR, by replacing “rows” with “columns” and vice versa, in the Algorithm.

## B SEM-ME and SEM-UR faithfulness assumptions

We first present the formal statement of SEM-ME and SEM-UR faithfulness assumptions in Appendix B.1. We also provide examples of violations of faithfulness. In Appendix B.2, we present an equivalent representation of SEM-ME and SEM-UR faithfulness, using the mixing matrix. Next, in Appendix B.3, we show that violation of faithfulness assumptions is a measure-zero event. Finally, we present the relation between bottleneck faithfulness [1] and SEM-UR faithfulness assumptions in Appendix B.4.

### B.1 Formal statement of faithfulness assumption

For a variable  $V_i$ , we define the ancestor set,  $An(V_i)$  (resp. the descendant set,  $De(V_i)$ ) as the sets of variables that have directed paths to  $V_i$  (resp. from  $V_i$ ); both excluding  $V_i$  itself. Note that in the literature, some works use the convention  $V_i \in An(V_i)$  and  $V_i \in De(V_i)$ . We do not use this convention here.

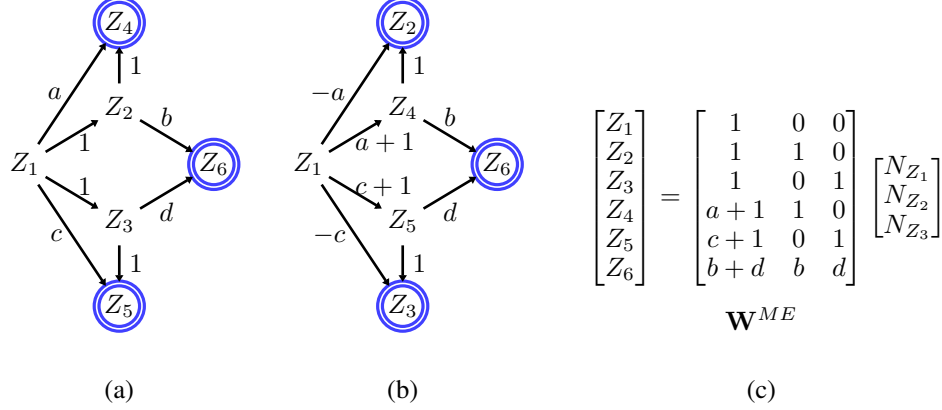

Figure 5: Example explaining Assumption 2(b). (a) The ground-truth model of a linear SEM-ME. (b) An alternative linear SEM-ME. (c) If  $ab + cd = 0$ , then both models have the same mixing matrix  $\mathbf{W}^{ME}$ .

For SEM-ME, define the possible parent set of a variable  $V_i \in \mathcal{Z} \cup \mathcal{Y}$ , as the union of the ancestor set of  $V_i$ ,  $An(V_i)$ , and the set of u-leaf nodes whose parents are subsets of  $An(V_i)$ . For any set  $\mathcal{V} \subseteq \mathcal{Z} \cup \mathcal{Y}$ , define  $\mathbf{TE}(\mathcal{V}, V_i)$  as the vector whose entries represent the total causal effects (i.e., sum of products of path coefficients) of the elements of  $\mathcal{V}$  on  $V_i$ . We define the total causal effect of a variable on itself to be 1. Similarly, for SEM-UR, define the possible children set of  $V_i \in \mathcal{H} \cup \mathcal{X}$  as the union of the descendant set of  $V_i$ ,  $De(V_i)$ , and the set of latent variables whose children sets are subsets of  $De(V_i)$ . For any set  $\mathcal{V} \subseteq \mathcal{H} \cup \mathcal{X}$ , define  $\mathbf{TC}(V_i, \mathcal{V})$  as the vector whose entries represent the total causal effects of  $V_i$  on the elements of  $\mathcal{V}$ .

**Assumption 2 (SEM-ME faithfulness)** (a) The total causal effect of an underlying variable  $V_i \in \mathcal{Z} \cup \mathcal{Y}$  on its descendant  $V_j \in \mathcal{Z} \cup \mathcal{Y}$  is not equal to zero.  
 (b) For each variable  $V_i \in \mathcal{Z} \cup \mathcal{Y}$ , (b1)  $\mathbf{TE}(An(V_i), V_i)$  is linearly independent of any  $k \leq |Pa(V_i)|$  vectors in  $\{\mathbf{TE}(An(V_i), V) : V \text{ is a possible parent of } V_i\}$ , except for the case when  $k = |Pa(V_i)|$  and for each u-leaf node  $V_l$  that corresponds to one of these  $k$  vectors,  $Pa(V_l) \subseteq Pa(V_i)$ ; (b2) If  $V_i$  is a u-leaf node, then for each parent  $V_j$  of  $V_i$ ,  $\mathbf{TE}(An(V_i) \setminus \{V_j\}, V_i)$  is linearly independent of any  $k \leq |Pa(V_j) \cup Pa(V_i)| - 1$  vectors in  $\{\mathbf{TE}(An(V_i) \setminus \{V_j\}, V) : V \text{ is a possible parent of } V_j\}$ , except for the case when  $k = |Pa(V_j) \cup Pa(V_i)| - 1$  and for each u-leaf node  $V_l$  that corresponds to one of these  $k$  vectors,  $Pa(V_l) \subseteq Pa(V_j) \cup Pa(V_i)$ .

**Assumption 3 (SEM-UR faithfulness)** (a) The total causal effect of an observed (latent) variable  $X_i \in \mathcal{X}$  ( $H_i \in \mathcal{H}$ ) on its descendant  $X_j \in \mathcal{X}$  is not equal to zero.  
 (b) For each variable  $V_i \in \mathcal{X} \cup \mathcal{H}$ , (b1)  $\mathbf{TC}(V_i, De(V_i))$  is linearly independent of any  $k \leq |Ch(V_i)|$  vectors in  $\{\mathbf{TC}(V, De(V_i)) : V \text{ is a possible child of } V_i\}$ , except for the case when  $k = |Ch(V_i)|$  and for each latent variable  $H_l$  that corresponds to one of these  $k$  vectors,  $Ch(H_l) \subseteq Ch(V_i)$ ; (b2) If  $V_i$  is a latent variable, then for each child  $X_j$  of  $V_i$ ,  $\mathbf{TC}(V_i, De(V_i) \setminus \{X_j\})$  is linearly independent of any  $k \leq |Ch(X_j) \cup Ch(V_i)| - 1$  vectors in  $\{\mathbf{TC}(V, De(V_i) \setminus \{X_j\}) : V \text{ is a possible child of } X_j\}$ , except for the case when  $k = |Ch(X_j) \cup Ch(V_i)| - 1$  and for each latent variable  $H_l$  that corresponds to one of these  $k$  vectors,  $Ch(H_l) \subseteq Ch(X_j) \cup Ch(V_i)$ .

We explain the aforementioned faithfulness assumptions using the following examples, which investigate various cases of violation of SEM-ME faithfulness, and show that our identifiability result in Theorem 3 may no longer hold under such violation. In Appendix B.3, we show that violation of SEM-ME faithfulness is a measure-zero event.

**Example 4** Consider the linear SEM-ME generated by the graph in Figure 2(a).<sup>5</sup> The mixing matrix is given in Figure 2. We have  $\mathbf{TE}(\{Z_1, Z_2\}, Z_4) = [a(b+c); b+c] = (b+c)\mathbf{TE}(\{Z_1, Z_2\}, Z_2)$ . This implies that  $\mathbf{TE}(An(Z_4) \setminus \{Z_3\}, Z_4)$  is linearly dependent on one vector  $\mathbf{TE}(An(Z_4) \setminus \{Z_3\}, Z_2)$  where  $Z_2$  is a possible parent of  $Z_3$ . Hence the model violates Assumption 2(b2).

According to Definition 6, the DOG of the ground truth model (Figure 2(a)) is  $\{\{Z_1\}, \{Z_2\}, \{Z_3, Z_4\}\}$ . Because either  $Z_3$  or  $Z_4$  can be the center of the last group, the DOG equivalence class should include both the ground-truth and the model represented by Figure 2(b). However, due to violation of Assumption 2(b2), the model represented by Figure 2(b), does not belong to the same DOG equivalence class as the ground-truth, and hence can be distinguished from the ground truth. Therefore, our identifiability result in Theorem 3 does not hold because of violation of faithfulness.

<sup>5</sup>This example was stated in Section 4.1, and we repeat it here using the notation  $\mathbf{TE}(\cdot, \cdot)$  in the formal statement of Assumption 2(b).



**Example 5** Consider the linear SEM-ME generated by the graph in Figure 5(a). The mixing matrix is given in Figure 5(c). We have  $\text{TE}(An(Z_6), Z_6) = [b+d; b; d]$ ,  $\text{TE}(An(Z_6), Z_4) = [a+1; 1; 0]$ , and  $\text{TE}(An(Z_6), Z_5) = [c+1; 0; 1]$ . If  $ab + cd = 0$ , then  $\text{TE}(An(Z_6), Z_6)$  can be written as  $b\text{TE}(An(Z_6), Z_4) + d\text{TE}(An(Z_6), Z_5)$ . That is,  $\text{TE}(An(Z_6), Z_6)$  can be written as the linear combination of two vectors; however, the variables corresponding to these two vectors, i.e.,  $Z_4, Z_5$ , are both **u-leaf** nodes and have a parent  $Z_1$  that is not a parent of  $Z_6$ . Therefore the model violates Assumption 2(b1). Note that  $ab + cd = 0$  is a measure-zero event if all parameters are randomly and independently drawn from continuous distributions.

Note that each of the six variables in the ground-truth model belongs to a separate direct ordered group. This means that the DOG equivalent class only includes the ground-truth. However, if  $ab + cd = 0$ , then the linear SEM-ME generated by the graph in Figure 5(b) is indistinguishable from the ground truth, since it has the same mixing matrix and the same structure (i.e., the two graphs are isomorphic). Once again, our identifiability result in Theorem 3 does not hold because of violation of faithfulness.

## B.2 Equivalent matrix form for faithfulness assumptions

In this section we present an equivalent matrix representation of Assumptions 2(b) and 3(b). For each variable  $V_i$  in SEM-ME, define  $\text{Supp}(V_i)$  as the support of the row in  $\mathbf{W}^{ME}$  corresponding to  $V_i$ :  $\text{Supp}(V_i) = \{N_{V_j} | j : [\mathbf{W}^{ME}]_{ij} \neq 0\}$ . For each variable  $V_i$  in SEM-UR, define  $\text{Supp}(N_{V_i})$  as the support of the column in  $\mathbf{W}^{UR}$  corresponding to  $N_{V_i}$ :  $\text{Supp}(N_{V_i}) = \{V_j | j : [\mathbf{W}^{UR}]_{ji} \neq 0\}$ .

Under this formulation, a variable  $V_j$  in a SEM-ME is a possible parent of  $V_i$  if and only if  $V_j \neq V_i$ , and  $\text{Supp}(V_j)$  is a subset of  $\text{Supp}(V_i) \setminus \{N_{V_i}\}$ , i.e.,  $\text{Supp}(V_i)$  excluding the exogenous noise term  $N_{V_i}$  if  $V_i$  is an **u-leaf** node [28]. A variable  $V_j$  in a SEM-UR is a possible child of  $V_i$  if and only if  $V_j \neq V_i$  and  $\text{Supp}(N_{V_j})$  is a subset of  $\text{Supp}(N_{V_i}) \setminus \{V_i\}$ , i.e.,  $\text{Supp}(V_i)$  excluding  $V_i$  itself if  $V_i$  is observed.

**Proposition 7** Assumptions 2(b) and 3(b) have the following equivalent matrix form:

**Assumption 2(b):** For a variable  $V_i \in \mathcal{Z} \cup \mathcal{Y}$ , (b1) denote  $\mathbf{W}_i^{ME}$  as the submatrix of  $\mathbf{W}^{ME}$  with rows corresponding to the possible parents of  $V_i$ , and columns corresponding to  $\text{Supp}(V_i) \setminus \{N_{V_i}\}$ . Then the vector  $\mathbf{W}_i^{ME}[V_i, \text{Supp}(V_i) \setminus \{N_{V_i}\}]$  cannot be written as any linear combination of  $k \leq |Pa(V_i)|$  rows in  $\mathbf{W}_i^{ME}$ , except for the case when  $k = |Pa(V_i)|$  and for each **u-leaf** node  $V_l$  that corresponds to one of these  $k$  rows,  $Pa(V_l) \subseteq Pa(V_i)$ .

(b2) If  $V_i$  is a **u-leaf** node, then for each parent  $V_j$  of  $V_i$ , denote  $\mathbf{W}_{ij}^{ME}$  as the submatrix of  $\mathbf{W}^{ME}$  with rows corresponding to the possible parents of  $V_j$ , and columns corresponding to  $\text{Supp}(V_i) \setminus \{N_{V_j}\}$ . Then  $\mathbf{W}_i^{ME}[V_i, \text{Supp}(V_i) \setminus \{N_{V_j}\}]$  cannot be written as any linear combination of  $k \leq |Pa(V_i) \cup Pa(V_j)| - 1$  rows in  $\mathbf{W}_{ij}^{ME}$ , except for the case when  $k = |Pa(V_i) \cup Pa(V_j)| - 1$  and for each **u-leaf** node  $V_l$  that corresponds to one of these  $k$  rows,  $Pa(V_l) \subseteq Pa(V_i) \cup Pa(V_j)$ .

**Assumption 3(b):** For a variable  $V_i \in \mathcal{H} \cup \mathcal{X}$ , (b1) denote  $\mathbf{W}_i^{UR}$  as the submatrix of  $\mathbf{W}^{UR}$  with columns corresponding to the exogenous noise terms of the possible children of  $V_i$ , and rows corresponding to  $\text{Supp}(N_{V_i}) \setminus \{V_i\}$ . Then the vector  $\mathbf{W}_i^{UR}[\text{Supp}(N_{V_i}) \setminus \{V_i\}, N_{V_i}]$  cannot be written as any linear combination of  $k \leq |Ch(V_i)|$  columns in  $\mathbf{W}_i^{UR}$ , except for the case when  $k = |Ch(V_i)|$  and for each latent variable  $H_l$  whose exogenous noise term corresponds to one of these  $k$  columns,  $Ch(H_l) \subseteq Ch(V_i)$ .

(b2) If  $V_i$  is a latent variable, then for each child  $X_j$  of  $V_i$ , denote  $\mathbf{W}_{ji}^{UR}$  as the submatrix of  $\mathbf{W}^{UR}$  with columns corresponding to the exogenous noise terms of the possible children of  $X_j$ , and rows corresponding to  $\text{Supp}(N_{V_i}) \setminus \{X_j\}$ . Then  $\mathbf{W}_i^{UR}[\text{Supp}(N_{V_i}) \setminus \{X_j\}, N_{V_i}]$  cannot be written as any linear combination of  $k \leq |Ch(V_i)| - 1$  columns in  $\mathbf{W}_{ji}^{UR}$ , except for the case when  $k = |Ch(X_j) \cup Ch(V_i)| - 1$  and for each latent variable  $H_l$  whose exogenous noise term corresponds to one of these  $k$  columns,  $Ch(H_l) \subseteq Ch(X_j) \cup Ch(V_i)$ .

## B.3 Violation of our faithfulness assumptions is a measure-zero event

In the following, we show that Assumption 2 is violated with probability zero if all model coefficients are randomly and independently drawn from continuous distributions. Same argument holds for Assumption 3, and hence the proof is omitted. Note that Assumption 2(a) is identical to conventional faithfulness in linear causal models, the violation of which is known to be a measure-zero event [15, 24]. Thus, it suffices to show that violation of Assumption 2(b) is a measure-zero event. We do so for both parts of Assumption 2(b).

**Assumption 2(b1):** Let  $\mathcal{T}_i$  denote the set of vectors  $\{\text{TE}(An(V_i), V) : V \text{ is a possible parent of } V_i\}$ . Recall that the total effects of  $An(V_i)$  on  $V_i$ , i.e.,  $\text{TE}(An(V_i), V_i)$ , can be written as a linear combination of the total effects of  $An(V_i)$  on parents of  $V_i$ , i.e.,  $\mathcal{P}_i = \{\text{TE}(An(V_i), V) : V \in Pa(V_i)\}$ :

$$\text{TE}(An(V_i), V_i) = \sum_{V_j \in Pa(V_i)} a_{ij} \text{TE}(An(V_i), V_j). \quad (8)$$

Further,  $\mathcal{A}_i = \{\text{TE}(An(V_i), V) : V \in An(V_i)\}$  constitutes a basis for  $\text{span}(\mathcal{T}_i)$ : Vectors in  $\mathcal{A}_i$  are linearly independent (because each ancestor has its exogenous noise term) and every vector in  $\mathcal{T}_i$  (which corresponds to a possible parent of  $V_i$ ) can be written as a linear combination of vectors in  $\mathcal{A}_i$ . Note that  $\mathcal{P}_i \subseteq \mathcal{A}_i$ . Therefore, if Assumption 2(b1) is violated, then  $\text{TE}(An(V_i), V_i)$  can either be (i) linearly dependent on  $k < |Pa(V_i)|$  vectors in  $\mathcal{T}_i$ , or (ii) linearly dependent on  $|Pa(V_i)|$  vectors in  $\mathcal{T}_i$  and at least one of these vectors does not belong to  $\text{span}(\mathcal{P}_i)$ . Both of these events are of measure zero, when all  $\{a_{ij}|j : V_j \in Pa(V_i)\}$  in Equation (8) are randomly and independently selected from continuous distributions. This follows because if we represent  $\text{TE}(An(V_i), V_i)$  and all vectors in  $\mathcal{T}_i$  as linear combinations of the vectors in  $\mathcal{A}_i$ , then case (i) corresponds to a solution of a linear system with  $k$  variables and at least  $|Pa(V_i)|$  equations (constraints), and case (ii) corresponds to a solution of a linear system with  $|Pa(V_i)|$  variables and at least  $|Pa(V_i)| + 1$  equations.

Assumption 2(b2): Similarly, we first show that for any parent  $V_j$  of  $V_i$ ,  $\text{TE}(An(V_i) \setminus \{V_j\}, V_i)$  can be written as the linear combination of  $|Pa(V_i) \cup Pa(V_j)| - 1$  linearly independent vectors in  $\mathcal{T}_i$  with probability one. To show this, we first note that Equation (8) holds for any subvector of  $\text{TE}(An(V_i), V_i)$ . Therefore,

$$\text{TE}(An(V_i) \setminus \{V_j\}, V_i) = \sum_{V_{j'} \in Pa(V_i)} a_{ij'} \text{TE}(An(V_i) \setminus \{V_j\}, V_{j'}).$$

Further, similar to Equation (8),  $\text{TE}(An(V_j), V_j)$  can also be written as a linear combination of the vectors in  $\{\text{TE}(An(V_j), V_k) : V_k \in Pa(V_j)\}$ . Since the total causal effect from any variable in  $An(V_i) \setminus (An(V_j) \cup \{V_j\})$  to  $V_j$  or any parent of  $V_j$  is zero, we have

$$\text{TE}(An(V_i) \setminus \{V_j\}, V_j) = \sum_{V_k \in Pa(V_j)} a_{jk} \text{TE}(An(V_i) \setminus \{V_j\}, V_k).$$

Combining these two equations, we have

$$\begin{aligned} \text{TE}(An(V_i) \setminus \{V_j\}, V_i) &= \sum_{V_{j'} \in Pa(V_i) \setminus \{V_j\}} a_{ij'} \text{TE}(An(V_i) \setminus \{V_j\}, V_{j'}) \\ &+ \sum_{V_k \in Pa(V_j)} a_{ij'} a_{jk} \text{TE}(An(V_i) \setminus \{V_j\}, V_k). \end{aligned} \quad (9)$$

Note that the right hand side of Equation (9) includes  $|Pa(V_i) \cup Pa(V_j)| - 1$  vectors, and for each vector that is included in both summations, the coefficients cancel out each other with probability zero.

Let  $\mathcal{T}_{ji}$ ,  $\mathcal{A}_{ji}$ ,  $\mathcal{P}_{ji}$  denote the set of vectors  $\{\text{TE}(An(V_i) \setminus \{V_j\}, V) : V \text{ is a possible parent of } V_j\}$ ,  $\{\text{TE}(An(V_i) \setminus \{V_j\}, V) : V \in An(V_j)\}$ ,  $\{\text{TE}(An(V_i) \setminus \{V_j\}, V) : V \in Pa(V_j) \cup Pa(V_i) \setminus \{V_j\}\}$ , respectively. Similarly,  $\mathcal{A}_{ji}$  constitutes a basis of  $\text{span}(\mathcal{T}_{ji})$ . If Assumption 2(b2) is violated, then all parents of  $V_i$  are ancestors of  $V_j$ , otherwise  $\text{TE}(An(V_i) \setminus \{V_j\}, V_i)$  cannot belong to  $\text{span}(\mathcal{T}_{ji})$ . This means that all vectors on the right hand side of Equation (9), i.e.,  $\mathcal{P}_{ji}$ , belong to  $\mathcal{A}_{ji}$ . Further,  $\text{TE}(An(V_i) \setminus \{V_j\}, V_i)$  can either be (i) linearly dependent on  $k < |Pa(V_i) \cup Pa(V_j)| - 1 = |\mathcal{P}_{ji}|$  vectors in  $\mathcal{T}_{ji}$ , or (ii) linearly dependent on  $|Pa(V_i) \cup Pa(V_j)| - 1$  vectors in  $\mathcal{T}_{ji}$  and at least one of these vectors does not belong to  $\text{span}(\mathcal{P}_{ji})$ . Both of these events are measure zero, when all  $\{a_{ij'}|j' : V_{j'} \in Pa(V_i), j' \neq V_j\} \cup \{a_{jk}|k : V_k \in Pa(V_j)\}$  in Equation (9) are randomly and independently selected from continuous distributions.

#### B.4 Bottleneck faithfulness implies SEM-UR faithfulness

We show that our SEM-UR faithfulness is weaker than Bottleneck faithfulness in [1], in the sense that more models satisfy SEM-UR faithfulness. Bottleneck faithfulness is defined as follows:

**Condition 3 (Bottleneck faithfulness)** *Define a bottleneck  $B$  from  $\mathcal{J}$  to  $\mathcal{K}$  as a set of variables where any directed path from  $j \in \mathcal{J}$  to  $k \in \mathcal{K}$  includes some variables in  $B$ , and a minimal bottleneck  $B$  from  $\mathcal{J}$  to  $\mathcal{K}$  as the bottleneck with the smallest size. Then for every  $\mathcal{J} \subseteq \mathcal{H} \cup \mathcal{X}$ ,  $\mathcal{K} \subseteq \mathcal{X}$ , if  $B$  is a minimal bottleneck from  $\mathcal{J}$  to  $\mathcal{K}$ , then  $\text{Rank}(\mathbf{W}_{\mathcal{K}}^{\mathcal{J}}) = |B|$ , where  $\mathbf{W}_{\mathcal{K}}^{\mathcal{J}}$  is the submatrix of  $\mathbf{W}^{UR}$  representing the total causal effect from variables in  $\mathcal{J}$  to variables in  $\mathcal{K}$ .*

“**Bottleneck faithfulness implies SEM-UR faithfulness**”: It has been shown in [1] that Condition 3 implies Assumption 3(a). For Assumption 3(b), it suffices to show that if either Assumption 3(b1) or (b2) is violated, then Condition 3 is violated.

Assumption 3(b1): Suppose  $V_i$  violates Assumption (b1). Then  $\text{TC}(V_i, De(V_i))$  is either: (i) linearly dependent on  $k < |Ch(V_i)|$  vectors in the set  $\mathcal{T}_i = \{\text{TC}(V, De(V_i)) : V \text{ is a possible child of } V_i\}$ , or (ii) linearly dependent on  $k = |Ch(V_i)|$  vectors in  $\mathcal{T}_i$  and the children set of at least one latent variable  $H_j$  corresponding to these vectors is not a subset of  $Ch(V_i)$ . Without loss of generality, suppose  $k$  is minimal, i.e.,  $\text{TC}(V_i, De(V_i))$  is linearly independent of any  $l$  vectors in  $\mathcal{T}_i$  for any  $l < k$ . Denote the set of possible children of  $V_i$  corresponding to these vectors as  $\mathcal{P}$ . Consider the set  $\mathcal{J} = \mathcal{P} \cup \{V_i\}$ , and  $\mathcal{K} = Des(V_i)$ .<sup>6</sup> Then  $\text{Rank}(\mathbf{W}_{\mathcal{K}}^{\mathcal{J}}) = |\mathcal{P}| = k$ ,

<sup>6</sup>Recall that we do not include  $V_i$  itself in  $Des(V_i)$ . This is different from [1] where they include  $V_i$ .

because (i)  $\mathbf{W}_{\mathcal{K}}^{V_i}$  can be written as a linear combination of the columns in  $\mathbf{W}_{\mathcal{K}}^{\mathcal{P}}$ , and (ii) columns in  $\mathbf{W}_{\mathcal{K}}^{\mathcal{P}}$  are linearly independent (otherwise  $k$  is not minimal).

In the following we show that any bottleneck from  $\mathcal{J}$  to  $\mathcal{K}$  is at least of size  $k + 1$ . First, any bottleneck from  $\mathcal{P}$  to  $\mathcal{K}$  is at least of size  $|\mathcal{P}| = k$ . This is because if there exists a bottleneck of size  $k - 1$ , then according to Proposition 1 of [1],  $\text{Rank}(\mathbf{W}_{\mathcal{K}}^{\mathcal{J}}) \leq k - 1$ . This contradicts the minimality of  $k$ . Next, for any bottleneck  $B$  from  $\mathcal{P}$  to  $\mathcal{K}$  with size  $k$ : (i) If  $k < |\text{Ch}(V_i)|$ , then  $B$  will cover at most  $k$  children of  $V_i$ . (ii) If  $k = |\text{Ch}(V_i)|$ . Note that there exists at least one child of  $H_j$ , denoted by  $X_k$ , that is not a child of  $V_i$ . Therefore, to block the edge  $H_j \rightarrow X_k$ ,  $B$  must include at least one variable between  $H_j$  and  $X_k$ . This implies that  $B$  includes at most  $|\text{Ch}(V_i)| - 1$  children of  $V_i$ .

In either case, there is at least one directed edge from  $V_i$  to one of its children that cannot be blocked by  $B$ . Therefore, the minimal bottleneck from  $\mathcal{J}$  to  $\mathcal{K}$  is at least of size  $k + 1$ , which violates bottleneck faithfulness condition.

*Assumption 3(b2)*: Similarly, suppose  $V_i$  and its child  $X_j$  violates Assumption (b2). Then  $\text{TC}(V_i, \text{De}(V_i) \setminus \{X_j\})$  is either: (i) linearly dependent on  $k < |\text{Ch}(V_i) \cup \text{Ch}(X_j)| - 1$  vectors in the set  $\mathcal{T}_{ji} = \{\text{TC}(V, \text{De}(V) \setminus \{X_j\}) : V \text{ is a possible child of } X_j\}$ , or (ii) linearly dependent on  $k = |\text{Ch}(V_i) \cup \text{Ch}(X_j)| - 1$  vectors in  $\mathcal{T}_{ji}$ , and the children set of at least one latent variable  $H_k$  corresponding to these vectors is not a subset of  $\text{Ch}(V_i) \cup \text{Ch}(X_j)$ .

Suppose  $k$  is minimal, and denote the set of possible children corresponding to these  $k$  vectors as  $\mathcal{P}$ . Consider the set  $\mathcal{J} = \mathcal{P} \cup \{V_i\}$  and  $\mathcal{K} = \text{Des}(V_i) \setminus \{X_j\}$ . Then  $\text{Rank}(\mathbf{W}_{\mathcal{K}}^{\mathcal{J}}) = |\mathcal{P}| = k$ . However, any bottleneck from  $\mathcal{J}$  to  $\mathcal{K}$  is at least of size  $k + 1$ . This is because: (i) Any bottleneck from  $\mathcal{P}$  to  $\mathcal{K}$  is at least of size  $|\mathcal{P}| = k$ ; (ii) For any bottleneck  $B$  from  $\mathcal{P}$  to  $\mathcal{K}$  with size  $k$ , there are  $|\text{Ch}(V_i) \cup \text{Ch}(X_j) \setminus \{X_j\}|$  variables in  $\mathcal{K}$  that is a child of either  $V_i$  or  $X_j$ . Therefore there is at least one directed edge from  $V_i$  or  $X_j$  to one of their children (excluding  $X_j$ ) that cannot be blocked by  $B$ . (If  $|B| = |\text{Ch}(V_i) \cup \text{Ch}(X_j)| - 1$ , then there is at least one variable in  $B$  that blocks the edge from  $H_k$  to its child that does not belong to  $\text{Ch}(V_i) \cup \text{Ch}(X_j)$ .) Therefore bottleneck faithfulness condition is violated.

“SEM-UR faithfulness does not imply bottleneck faithfulness”: In the following we will provide an example which satisfies Assumption 3 but violates Condition 3. This example is introduced in [1]. Consider the following linear SEM-UR involving three latent variables  $H = [H_1, H_2, H_3]$  and four observed variables  $X = [X_1, X_2, X_3, X_4]$ :

$$H = N_H, \quad X = \begin{bmatrix} 0 & 1 & -1 \\ 2 & 2 & 0 \\ 3 & 3 & 0 \\ 4 & 0 & 4 \end{bmatrix} H + \mathbf{0}X + N_X.$$

It has been shown in [1] that the minimal bottleneck from  $\mathcal{H} = \{H_1, H_2, H_3\}$  to  $\mathcal{X} = \{X_1, X_2, X_3, X_4\}$  is  $\mathcal{H}$  with  $|\mathcal{H}| = 3$ , while  $\text{Rank}(\mathbf{W}_{\mathcal{X}}^{\mathcal{H}}) = 2$ . Therefore the model violates Condition 3. On the contrary, the model satisfies Assumption 3. This is because the possible children set of each observed variable is empty set (meaning that (b2) is satisfied), and the possible children set of each latent variable only includes its children (meaning that (b1) is satisfied).

## C Proofs of the main results

### C.1 Proof of Theorem 1

We first observe that in a SEM-ME, whether a non-leaf underlying variable  $V_i$  is observed (i.e.,  $V_i \in \mathcal{Y}$ ) or measured with error (i.e.,  $V_i \in \mathcal{Z}$ ) does not change the relevant mixing matrix  $\mathbf{W}^{ME}$ . Specifically, in the overall mixing matrix  $\mathbf{W}$ , cf. Equation (6), the exogenous noise terms associated with non-leaf underlying variables correspond to columns with at least two non-zero entries. This follows because a non-leaf variable influences at least two other variables (its own measurement and its child(ren) in  $\mathcal{Z} \cup \mathcal{Y}$ ). On the other hand, the measurement error terms associated with the non-leaf underlying variables correspond to columns with only one non-zero entry, since the measurement error term only influences one variable (i.e., the corresponding measurement in  $\mathcal{U}$ ). Thus, by removing the identity matrix part of  $\mathbf{W}$ , the remaining part, i.e.,  $\mathbf{W}^{ME}$  does not change if a non-leaf underlying variable is observed or measured with error.

For a linear SEM-ME,  $M'$ , without loss of generality, suppose that all non-leaf underlying variables are observed. That is, all nu-leaf nodes belong to  $\mathcal{Y}$ , and u-leaf nodes belong to  $\mathcal{Z}$ . Denote the dimension of  $Y$  (i.e., the number of the nu-leaf nodes) as  $p_n$ . Let us first permute the variables in  $Y$  in the reversed causal order, and denote the result of this permutation by  $Y^*$ . Thus,

$$Y^* = \mathbf{P}Y \implies \begin{bmatrix} Z^L \\ Y^* \end{bmatrix} = \begin{bmatrix} \mathbf{D} \\ \mathbf{C}^* \end{bmatrix} Y^* + \begin{bmatrix} 0 \\ N_{Y^*} \end{bmatrix},$$

where  $\mathbf{P}$  is a  $p_n \times p_n$  permutation matrix, and  $N_{Y^*} = \mathbf{P}N_Y$  is the permuted noise vector corresponding to  $Y^*$ . Further,  $\mathbf{C}^* = \mathbf{P}\mathbf{C}\mathbf{P}^\top$  is a row and column permuted version of  $\mathbf{C}$ , such that  $\mathbf{C}^*$  is strictly upper triangular.

Therefore, the mixing matrix  $\mathbf{W}^{ME}$  corresponding to  $M'$  can be written as

$$\mathbf{W}^{ME}(M') = \begin{bmatrix} \mathbf{I} & \mathbf{0} \\ \mathbf{0} & \mathbf{P}^\top \end{bmatrix} \mathbf{W}_*^{ME} \mathbf{P}, \quad \text{where} \quad \mathbf{W}_*^{ME} = \begin{bmatrix} \mathbf{D}(\mathbf{I} - \mathbf{C}^*) \\ \mathbf{I} - \mathbf{C}^* \end{bmatrix}. \quad (10)$$

Next, we derive the mixing matrix of the corresponding SEM-UR under the mapping  $\phi$ . Suppose the corresponding SEM-UR can be written as

$$H_\phi = N_{H_\phi}, \quad X_\phi = \mathbf{B}_\phi H_\phi + \mathbf{A}_\phi X_\phi + N_{X_\phi}.$$

Note that under mapping  $\phi$ , all `u-leaf` nodes in  $M'$  are mapped to latent variables in  $H_\phi$ , and all `nu-leaf` nodes in  $M'$  are mapped to observed variables in  $X_\phi$ . Further, all edges are reversed. This means that there exists a permutation of  $H_\phi$ , denoted by  $H_{\phi_i}^*$ , such that  $Z_i$  is mapped to  $H_{\phi_i}^*$  and  $Y_i^*$  is mapped to  $X_i$ . Note that the  $X$  variables are arranged according to a certain causal order, which is not necessarily the case for the  $Y$  variables. Further, if there is an edge from  $Y_i^*$  to  $Y_j^*$  in  $M'$  with weight  $w$ , then there exists an edge from  $X_i$  to  $X_j$  in  $\phi(M')$  with weight  $w$ . Therefore,  $\mathbf{A}_\phi = (\mathbf{C}^*)^\top$ . Similarly,  $\mathbf{B}_\phi \mathbf{P}_H = \mathbf{D}^\top$ , where  $\mathbf{P}_H$  represents the re-permutation of the latent variables corresponding to the order of the `u-leaf` nodes. The mixing matrix of  $\phi(M')$  can be written as

$$\mathbf{W}^{UR}(M) = \left[ (\mathbf{I} - (\mathbf{C}^*)^\top) \mathbf{D}^\top \mathbf{P}_H^\top \quad (\mathbf{I} - (\mathbf{C}^*)^\top) \right] = \left[ (\mathbf{I} - \mathbf{C}^*)^\top \mathbf{D}^\top \mathbf{P}_H^\top \quad (\mathbf{I} - \mathbf{C}^*)^\top \right]. \quad (11)$$

Comparing Equation (10) to Equation (11), we have

$$\mathbf{W}^{ME}(M') = \begin{bmatrix} \mathbf{I} & \mathbf{0} \\ \mathbf{0} & \mathbf{P}^\top \end{bmatrix} \begin{bmatrix} \mathbf{P}_H^\top & \mathbf{0} \\ \mathbf{0} & \mathbf{I} \end{bmatrix} (\mathbf{W}^{UR}(M))^\top \mathbf{P}$$

Therefore, there exist column permutations of  $\mathbf{W}^{ME}(M')$  and  $\mathbf{W}^{UR}(M)$ , namely,

$$\tilde{\mathbf{W}}^{ME}(M') = \mathbf{W}^{ME}(M') \mathbf{P}^\top, \quad \tilde{\mathbf{W}}^{UR}(M) = \mathbf{W}^{UR}(M) \begin{bmatrix} \mathbf{P}_H & \mathbf{0} \\ \mathbf{0} & \mathbf{P} \end{bmatrix}$$

such that  $\tilde{\mathbf{W}}^{ME}(M') = (\tilde{\mathbf{W}}^{UR}(M))^\top$ .

## C.2 Proof of Theorem 2

In order to prove Theorem 2, we need to prove Propositions 1 and 2, and that the AOG equivalence class is the extent level of identifiability under Assumption 2(a). We begin by proving Proposition 2 (and its counterpart for direct ordered grouping). We formulate these in the following lemma.

**Lemma 1** *Given the mixing matrix  $\mathbf{W}^{ME}$  (resp.  $\mathbf{W}^{UR}$ ) and the AOG/DOG of the model, all the coefficients are identified (up to the permutation and scaling of the columns of  $\mathbf{B}$  in SEM-UR) if and only if the centers (resp. exogenous noise assignments) of the ancestral/direct ordered groups are identified.*

*Proof.* “only-if direction”: If all the coefficients are identified, i.e., matrices  $\mathbf{C}, \mathbf{D}$  in Equation (2) (and matrices  $\mathbf{A}, \mathbf{B}$  in Equation (4)) are identified, then the structure of the model is identified. Therefore, we can identify ancestral/direct ordered grouping of the model and find the center of each ancestral/direct ordered group.

“if direction”: For SEM-ME, given the identified centers in each ordered group, we compute the coefficients of the model from the mixing matrix  $\mathbf{W}^{ME}$  as follows. According to the definition of AOG/DOG, only the first  $p_n$  ordered groups can include more than one element; recall that  $p_n$  denotes the number of `nu-leaf` nodes. Therefore, for any possible selection of the centers in each group, consider the submatrix of  $\mathbf{W}^{ME}$  where the rows correspond to the first  $p_n$  selected centers. This submatrix can be permuted to a lower-triangular matrix with non-zero diagonal, and maps to  $(\mathbf{I} - \mathbf{C})^{-1}$  in Equation (5); recall that  $\mathbf{C}$  represents the edges among the first  $p_n$  centers (i.e., the `nu-leaf` nodes in the model). That is,  $\mathbf{C}$  can be identified by first normalizing the columns of  $\mathbf{W}^{ME}$ , and then taking the inverse of the submatrix that corresponds to the identified centers. Note that the lower-triangular matrix (after permutation) must have diagonal one. If the diagonal entry has value not equal to one, then this number represents the noise coefficient, and can be removed by column normalization. Matrix  $\mathbf{D}$ , which represents the edges from `nu-leaf` nodes to `u-leaf` nodes can be deduced from remaining submatrix of  $\mathbf{W}^{ME}$  that maps to  $\mathbf{D}(\mathbf{I} - \mathbf{C})^{-1}$ . Therefore, all coefficients can be identified.

For SEM-UR, given the exogenous noise terms of the identified centers in each ordered group, we use a similar method to compute the coefficients of the model from the mixing matrix  $\mathbf{W}^{UR}$ . Specifically,  $\mathbf{A}$  in Equation (4) can be identified using the submatrix of  $\mathbf{W}^{UR}$  where the columns correspond to the last  $q$  selected centers ( $q$  denotes the number of observed variables). Matrix  $\mathbf{B}$  can be deduced from the remaining submatrix of  $\mathbf{W}^{UR}$ . Note that permuting and normalizing the columns of the submatrix that maps to  $(\mathbf{I} - \mathbf{A})^{-1}$  does not affect the submatrix that maps to  $\mathbf{B}(\mathbf{I} - \mathbf{A})^{-1}$ . This means that the true permutation and scaling of  $\mathbf{B}$  cannot be identified.  $\blacksquare$

In the remainder of the proof of Theorem 2, we focus on linear SEM-ME; the proof for linear SEM-UR follows similarly. The proof of the remaining assertions consists of two parts. In the first part, we show that models in the same AOG equivalence class satisfy Proposition 1 and Assumption 2(a). That is, given the mixing matrix  $\mathbf{W}^{ME}$ , under different choices of the center in each ancestral ordered group, the alternative model (1) satisfies Assumption 2(a), and (2) preserves the causal order among the ancestral ordered groups. In the second part, we show that any alternative model that has the same mixing matrix as the ground-truth but does not belong to the same AOG equivalence class violates Assumption 2(a). We can see from the proof of Lemma 1 that the model can be identified once all the `nu-leaf` nodes (i.e., variables corresponding to the rows of  $\mathbf{C}$ ) are identified. Therefore, we show that, if at least one of the first  $p_n$  ancestral ordered groups in the ground-truth does not include any of the `nu-leaf` nodes in the alternative model, then the alternative model violates Assumption 2(a).

We use  $Pa_M(V_i)$  and  $An_M(V_i)$  to denote the parent set and ancestor set of variable  $V_i$  in model  $M$  throughout the remaining of the proof.

**Proof of the first part:**

*Proof of (1):* Note that Assumption 2(a) (i.e., conventional faithfulness assumption) is equivalent to the following: If  $V_i$  is an ancestor of  $V_j$ , then the support of the row of  $\mathbf{W}^{ME}$  corresponding to  $V_i$  is a subset of the support of the row of  $\mathbf{W}^{ME}$  corresponding to  $V_j$ . Further, the converse is also true given that  $V_i$  is a `nu-leaf` node.

Let  $M$  denote the ground-truth, and let  $M'$  denote an alternative model that belongs to the same AOG equivalence class as  $M$ . We first show that if some center nodes in  $M$  are swapped with other nodes in their respective ancestral ordered groups, then an added edge(s) to any node  $V$  in  $M'$  can only originate from variables in  $An_M(V)$ . To show this, suppose that  $V_{i_1}, \dots, V_{i_m}$  represent some centers of the ancestral ordered groups in  $M$ , where  $m \leq p_n$ , and  $\{i_1, \dots, i_m\}$  is consistent with the causal order among the `nu-leaf` nodes in  $M$ . Now, the centers in  $M'$  are changed from  $V_{i_1}, \dots, V_{i_m}$  to  $V_{j_1}, \dots, V_{j_m}$ , where  $V_{i_k}$  and  $V_{j_k}$  are in the same ancestral ordered group,  $\forall k \in [m]$ .

Consider the structural equations of  $V_{i_1}$  (first changed center in  $M$ ) and  $V_{j_1}$  (the swapped center in  $M'$ ), and  $V_{k_1}$  which is any child of  $V_{i_1}$  in  $M$  (other than  $V_{k_1}$ ). Since  $V_{i_1}$  and  $V_{j_1}$  belong to the same ancestral ordered group, it follows by the definition of AOG that parents of  $V_{j_1}$ , except for  $V_{i_1}$ , are also ancestors of  $V_{i_1}$  in  $M$ . Therefore the structural equations are:

$$\begin{aligned} V_{i_1} &= \sum_{l:V_l \in Pa_M(V_{i_1})} a_{i_1 l} V_l + N_{V_{i_1}}, \\ V_{j_1} &= a_{j_1 i_1} V_{i_1} + \sum_{l_j:V_{l_j} \in An_M(V_{i_1})} a_{j_1 l_j} V_{l_j}, \\ V_{k_1} &= a_{k_1 i_1} V_{i_1} + \sum_{l_k:V_{l_k} \in Pa_M(V_{k_1})} a_{k_1 l_k} V_{l_k} + N_{V_{k_1}}. \end{aligned}$$

Now, we choose  $V_{j_1}$  to be the center of the corresponding ordered group in  $M'$  (replacing the center  $V_{i_1}$  in  $M$ ). Now, in  $M'$ ,  $V_{i_1}$  is a child of  $V_{j_1}$  and is a `u-leaf` node. Also, the children of  $V_{i_1}$  in  $M$  are now children of  $V_{j_1}$  in  $M'$ . Therefore, the structural equations of  $V_{i_1}$ ,  $V_{j_1}$  and  $V_{k_1}$  in  $M'$  are

$$\begin{aligned} V_{j_1} &= \sum_{l_j:V_{l_j} \in An_M(V_{i_1})} a_{j_1 l_j} V_{l_j} + \sum_{l:V_l \in Pa_M(V_{i_1})} a_{j_1 i_1} a_{i_1 l} V_l + a_{j_1 i_1} N_{V_{i_1}}, \\ V_{i_1} &= a_{j_1 i_1}^{-1} V_{j_1} + \sum_{l_j:V_{l_j} \in An_M(V_{i_1})} a_{j_1 i_1}^{-1} a_{j_1 l_j} V_{l_j}, \\ V_{k_1} &= a_{k_1 i_1} \left( a_{j_1 i_1}^{-1} V_{j_1} + \sum_{l_j:V_{l_j} \in An_M(V_{i_1})} a_{j_1 i_1}^{-1} a_{j_1 l_j} V_{l_j} \right) + \sum_{l_k:V_{l_k} \in Pa_M(V_{k_1})} a_{k_1 l_k} V_{l_k} + N_{V_{k_1}}. \end{aligned}$$

Comparing both sets of structural equations, we see that the additional edges to  $V_{j_1}$  and  $V_{k_1}$  in  $M'$  originate from variables in  $An_M(V_{i_1})$ . Since  $V_{i_1}$  is a parent of both, this means that variables in  $An_M(V_{i_1})$  are also ancestors of  $V_{j_1}$  and  $V_{k_1}$ . This further implies that the ancestor sets of all variables remain the same after this change, i.e., if  $V_i$  is an ancestor of  $V_j$  in  $M$ , then  $V_i$  (or the node that replaces  $V_i$ ) is an ancestor of  $V_j$  (or the node that replaces  $V_j$ ) in  $M'$ . By repeating the same procedure, i.e., swapping  $V_{i_k}$  with  $V_{j_k}$  for  $k = 2, 3, \dots, m$ , the resulting model  $M'$  will only add edges from variables in  $An_M(V)$  to  $V$ ,  $\forall V \in \mathcal{Y} \cup \mathcal{Z}$ .

Next, we show, by contradiction, that if  $M$  satisfies Assumption 2(a), then  $M'$  also satisfies Assumption 2(a). Suppose  $M'$  violates Assumption 2(a). This means that there exist  $V_0$  and  $V$  such that  $V_0$  is an ancestor of  $V$  in  $M'$  but the support of  $V_0$  (i.e., its corresponding row in  $\mathbf{W}^{ME}$ ) is not a subset of the support of  $V$ . Note that since  $V_0$  is a `nu-leaf` node in  $M'$ , hence it is a center node of some ancestral ordered group in  $M'$ . Let  $V'_0$  denote the center of the ancestral ordered group of  $V_0$  in  $M$  (which can be  $V_0$  itself). Note that  $V_0$  has the

same support as  $V'_0$  since they belong to the same ancestral ordered group. Therefore, the support of  $V'_0$  is not a subset of the support of  $V$ . Since  $M$  satisfies Assumption 2(a), this means that  $V'_0$  is not an ancestor of  $V$  in  $M$ . However, in obtaining  $M'$  from  $M$  (i.e., by switching some centers in  $M$ ), the edges added to  $V$  in  $M'$  only come from ancestors of  $V$  in  $M$ . This means that  $V_0$  cannot be an ancestor of  $V$  in  $M'$ , which leads to a contradiction. Therefore,  $M'$  satisfies Assumption 2(a).

*Proof of (2):* Given that the alternative model  $M'$  satisfies Assumption 2(a), we show that  $M'$  preserves the causal order among the ancestral ordered groups. We show this by contradiction. Suppose that a variable  $V_0$  in a later group causes another variable  $V$  in an earlier group in  $M'$ ; according to the causal order among the groups in  $M$ . Note that  $V_0$  is a `nu-leaf` node in  $M'$  since it causes  $V$ , and hence it is the center of some ancestral ordered group in  $M'$ . Let  $V'_0$  be the center of the corresponding group in  $M$ , with an associated exogenous noise term denoted by  $N_{V'_0}$ . Since  $V_0$  and  $V'_0$  belong to the same ancestral ordered group,  $N_{V'_0}$  must belong to the support of  $V_0$ . However, since  $V$  is in an earlier group than  $V_0$  in  $M'$ ,  $N_{V'_0}$  is not in the support of  $V$ . Therefore the support of  $V_0$  is not a subset of the support of  $V$ , and hence,  $M'$  violates Assumption 2(a).

### Proof of the second part:

If the alternative model  $M'$  does not belong to the AOG equivalence class of the ground-truth  $M$ , then at least one of the first  $p_n$  ancestral ordered groups in  $M$  does not include any of the `nu-leaf` nodes in  $M'$ . Denote the center of this ordered group as  $V_i$ , and let  $N_{V_i}$  denote its exogenous noise. Since  $V_i$  is a `u-leaf` node in  $M'$ , there is at least one parent of  $V_i$  in  $M'$  that also includes  $N_{V_i}$  (i.e., is affected by  $N_{V_i}$  directly or indirectly). Denote this variable as  $V_j$ . Since  $V_j$  includes  $N_{V_i}$ , it must be a descendant of  $V_i$  in  $M$ . As  $M$  satisfies Assumption 2(a), this means that the support of  $V_j$  (in  $\mathbf{W}^{ME}$ ) is a superset of the support of  $V_i$ . Further, since the ancestral ordered group of  $V_i$  does not include any `nu-leaf` nodes in  $M'$ ,  $V_j$  does not belong to the ancestral ordered group of  $V_i$ . This means that the support of  $V_j$  (in  $\mathbf{W}^{ME}$ ) is not the same as the support of  $V_i$ . Therefore, the support of  $V_j$  (in  $\mathbf{W}^{ME}$ ) is a strict superset of the support of  $V_i$ . Since  $V_j$  is a parent of  $V_i$  in  $M'$ , this violates Assumption 2(a) on the alternative model  $M'$ .

**Conclusion:** We showed that by under different choices of the centers in the ancestral ordered groups, we can always find a model  $M'$  that: (1) has the same mixing matrix; (2) satisfies Assumption 2(a); (3) preserves the causal order among ancestral ordered groups. Thus, we cannot distinguish  $M'$  from the ground-truth under Assumption 2(a) alone. Further, we show that any model that have the same mixing matrix but does not belong to the AOG equivalence class does violate Assumption 2(a) and can be distinguished from the ground-truth  $M$ . Therefore the extent level of identifiability can be characterized by AOG equivalence class.

## C.3 Proof of Theorem 3

To prove Theorem 3, we need to prove Propositions 3 and 4, and that the DOG equivalence class is the extent level of identifiability under Assumption 2. The proof can be divided into two parts. We first show the necessity part, that is, models in the same DOG equivalence class as the ground-truth satisfy Assumption 2 and Proposition 3, hence cannot be distinguished from the ground-truth. We then show the sufficiency part, i.e., any model that has the same mixing matrix but does not belong to the DOG equivalence class of the ground-truth violates Assumption 2.

### C.3.1 Proof of necessity

We have shown in Lemma 1 that models in the same DOG equivalence class can be identified by the choice of centers of the direct ordered groups. In the following, given the ground-truth model  $M$  and a certain choice of the centers that corresponds to an alternative model  $M'$ , where  $M'$  belongs to the same DOG equivalence class as  $M$ , we show that in the alternative model: (1) No edges are added; (2) No edges are removed; (3) Faithfulness is preserved. Therefore we cannot distinguish the alternative model from the ground truth.

Suppose that  $V_{i_1}, \dots, V_{i_m}$  represent some centers of the direct ordered groups in the ground-truth  $M$ , where  $m \leq p_n$ , and  $\{i_1, \dots, i_m\}$  is consistent with the causal order among the `nu-leaf` nodes in  $M$ . Now, the centers in  $M'$  are changed from  $V_{i_1}, \dots, V_{i_m}$  to  $V_{j_1}, \dots, V_{j_m}$ , where  $V_{i_k}$  and  $V_{j_k}$  are in the same direct ordered group,  $\forall k \in [m]$ . It follows by the definition of DOG that the edge  $V_{i_k} \rightarrow V_{j_k}$  violates Condition 1,  $\forall k \in [m]$ .

Note that according to Condition 1, we have the following two properties: (1) For each `nu-leaf` node  $V$  and each `u-leaf` node  $V'$  that belongs to the same direct ordered group as  $V$ ,  $Pa(V') \setminus \{V\} \subseteq Pa(V)$ . (2) All `u-leaf` nodes that belong to the same direct ordered group have the same parent set; otherwise, Condition 1 will be satisfied and the `u-leaf` nodes cannot belong to the same direct ordered group.

Lastly, for any model  $M$ , any set of variables  $\mathcal{V}$  and variable  $V_j$ , let  $\mathbf{TE}_M(\mathcal{V}, V_j)$  denote the vector of total causal effects from variables in  $\mathcal{V}$  to  $V_j$  in model  $M$ . Note that the total effect from a variable  $V_i$  to  $V_j$  in  $M_0$  is equal to the entry in  $\mathbf{W}^{ME}$  with row corresponding to  $V_j$  and column corresponding to  $N_{V_i}$ . Since  $M$  and  $M'$  has the

same mixing matrix, if  $N_{V_i}$  is the exogenous noise term of another variable  $V'_i$  in  $M'$ , then the total effect from a variable  $V_i$  to  $V_j$  in  $M$  is equal to the total effect from  $V'_i$  to  $V_j$  in  $M'$ , i.e.,  $\text{TE}_{M_0}(\{V_i\}, V_j) = \text{TE}_{M'}(\{V'_i\}, V_j)$ .

**Proof of (1):** Consider a set of models  $M_0, M_1, \dots, M_m$ , where  $M_0 = M$ , and  $M_k$  changes the centers  $V_{i_1}, \dots, V_{i_k}$  in  $M_0$  to  $V_{j_1}, \dots, V_{j_k}$ ;  $k \in [m]$ . In the following, we show that for all  $k \in [m]$ , obtaining  $M_k$  from  $M_0$  as described above does not add extra edges in  $M_k$ .

We start with  $k = 1$ . The structural equations of  $V_{i_1}$  and  $V_{j_1}$  in  $M_0$  are:

$$V_{i_1} = \sum_{l: V_l \in Pa_{M_0}(V_{i_1})} a_{i_1 l} V_l + N_{V_{i_1}}, \quad (12)$$

$$V_{j_1} = \sum_{l_j: V_{l_j} \in Pa_{M_0}(V_{j_1}) \setminus \{V_{i_1}\}} a_{j_1 l_j} V_{l_j} + a_{j_1 i_1} V_{i_1}, \quad (13)$$

Further, the structural equation of any child  $V_{k_1}$  of  $V_{i_1}$  in  $M_0$  is:

$$V_{k_1} = \sum_{l_k: V_{l_k} \in Pa_{M_0}(V_{k_1}) \setminus \{V_{i_1}\}} a_{k_1 l_k} V_{l_k} + a_{k_1 i_1} V_{i_1} + N_{V_{k_1}}. \quad (14)$$

Note that  $N_{V_{k_1}} = 0$  if and only if  $V_{k_1}$  is a u-leaf node.

In  $M_1$ , since we only swap  $V_{i_1}$  and  $V_{j_1}$ , the structural equations of all variables in  $\mathcal{Z} \cup \mathcal{Y} \setminus \{V_{i_1}, V_{j_1}\} \cup Ch_{M_0}(V_{i_1})$  remain the same as those in  $M_0$ . From (12) and (13), the structural equation of  $V_{j_1}$  in  $M_1$ :

$$\begin{aligned} V_{j_1} &= \sum_{l_j: V_{l_j} \in Pa_{M_0}(V_{j_1}) \setminus \{V_{i_1}\}} a_{j_1 l_j} V_{l_j} + a_{j_1 i_1} \left( \sum_{l: V_l \in Pa_{M_0}(V_{i_1})} a_{i_1 l} V_l + N_{V_{i_1}} \right) \\ &= \sum_{l: V_l \in Pa_{M_0}(V_{i_1})} a_{j_1 i_1} a_{i_1 l} V_l + \sum_{l_j: V_{l_j} \in Pa_{M_0}(V_{j_1}) \setminus \{V_{i_1}\}} a_{j_1 l_j} V_{l_j} + a_{j_1 i_1} N_{V_{i_1}}. \end{aligned}$$

Since the edge  $V_{i_1} \rightarrow V_{j_1}$  violates Condition 1(a),  $Pa_{M_0}(V_{j_1}) \setminus \{V_{i_1}\} \subseteq Pa_{M_0}(V_{i_1})$ . By defining  $a'_{j_1 l} \triangleq a_{j_1 i_1} a_{i_1 l} + a_{j_1 l} \mathbf{1}[V_l \in Pa_{M_0}(V_{j_1})]$  for all  $V_l \in Pa_{M_0}(V_{i_1})$ , we can re-write  $V_{j_1}$  as

$$V_{j_1} = \sum_{V_l \in Pa_{M_0}(V_{i_1})} a'_{j_1 l} V_l + a_{j_1 i_1} N_{V_{i_1}}. \quad (15)$$

Next, from (13), the structural equation of  $V_{i_1}$  in  $M_1$  is:

$$V_{i_1} = \frac{1}{a_{j_1 i_1}} V_{j_1} - \sum_{l_j: V_{l_j} \in Pa_{M_0}(V_{j_1}) \setminus \{V_{i_1}\}} \frac{a_{j_1 l_j}}{a_{j_1 i_1}} V_{l_j}. \quad (16)$$

Lastly, by substituting  $V_{i_1}$  in (14) by (16), the structural equation of  $V_{k_1}$  in  $M_1$  is:

$$V_{k_1} = \sum_{l_k: V_{l_k} \in Pa_{M_0}(V_{k_1}) \setminus \{V_{i_1}\}} a_{k_1 l_k} V_{l_k} + a_{k_1 i_1} \left( \frac{1}{a_{j_1 i_1}} V_{j_1} - \sum_{l_j: V_{l_j} \in Pa_{M_0}(V_{j_1}) \setminus \{V_{i_1}\}} \frac{a_{j_1 l_j}}{a_{j_1 i_1}} V_{l_j} \right) + N_{V_{k_1}}.$$

Since  $V_{i_1} \rightarrow V_{j_1}$  violates Condition 1(b),  $Pa_{M_0}(V_{j_1}) \subseteq Pa_{M_0}(V_{k_1})$ . Therefore, by defining  $a'_{k_1 l_k} \triangleq a_{k_1 l_k} - \frac{a_{k_1 i_1} a_{j_1 l_k}}{a_{j_1 i_1}} \mathbf{1}[V_{l_k} \in Pa_{M_0}(V_{j_1})]$ , we can re-write  $V_{k_1}$  as

$$V_{k_1} = \sum_{l_k: V_{l_k} \in Pa_{M_0}(V_{k_1}) \setminus \{V_{i_1}\}} a'_{k_1 l_k} V_{l_k} + \frac{a_{k_1 i_1}}{a_{j_1 i_1}} V_{j_1} + N_{V_{k_1}}. \quad (17)$$

Recall that in  $M_1$ , the structural equations of all underlying variables in  $\mathcal{Z} \cup \mathcal{Y} \setminus \{V_{i_1}, V_{j_1}\} \cup Ch_{M_0}(V_{i_1})$  are the same as  $M_0$ . Further, the structural equations of  $V_{i_1}, V_{j_1}$  and any  $V_{k_1} \in Ch_{M_0}(V_{i_1})$  in (12)-(14) are replaced by (15)-(17). Thus, we have  $Pa_{M_1}(V_{j_1}) = Pa_{M_0}(V_{i_1})$ ,  $Pa_{M_1}(V_{i_1}) = \{V_{j_1}\} \cup Pa_{M_0}(V_{j_1}) \setminus \{V_{i_1}\}$ , and  $Pa_{M_1}(V_{k_1}) = \{V_{j_1}\} \cup Pa_{M_0}(V_{k_1}) \setminus \{V_{i_1}\}$ . Therefore no edge will be added in  $M_1$ , and  $V_{i_g} \rightarrow V_{j_g}$  still violates Condition 1 in  $M_1$  for all  $g = [2 : m]$ .

Note that  $Pa_{M_1}(V_{j_1})$  (resp.  $Pa_{M_1}(V_{k_1})$ ) may be a subset of  $Pa_{M_0}(V_{i_1})$  (resp.  $\{V_{j_1}\} \cup Pa_{M_0}(V_{k_1}) \setminus \{V_{i_1}\}$ ) due to certain parameter cancellation in  $a'_{j_1 l}$  (resp.  $a'_{k_1 l_k}$ ). However, it does not affect our conclusion here as we show that no edges are added in  $M_1$ . We will show in Part (2) that if this parameter cancellation happens (at any point of the procedure of swapping centers), then the model violates faithfulness assumption.

Next, consider  $k = 2$ . Repeating the same procedure of swapping centers, the structural equations of  $M_2$  can be obtained from  $M_1$ . Similarly, we have  $Pa_{M_2}(V_{j_2}) = Pa_{M_1}(V_{i_2})$ ,  $Pa_{M_2}(V_{i_2}) = \{V_{j_2}\} \cup Pa_{M_1}(V_{j_2}) \setminus \{V_{i_2}\}$ ,

and  $Pa_{M_2}(V_{k_2}) = \{V_{j_2}\} \cup Pa_{M_1}(V_{k_2}) \setminus \{V_{i_2}\}$ . Therefore, no edge will be added when obtaining  $M_2$  from  $M_0$ .

By repeating the same procedure for  $k = 3, \dots, m$ , we conclude that obtaining the final model  $M_m$  from  $M_0$  does not add additional edges in  $M_m$  compared to  $M_0$ .

**Proof of (2):** Following the procedure of swapping centers described in Part (1), we show that if any edge from  $M_0$  is removed in  $M_m$ , then the ground-truth model  $M_0$  violates Assumption 2. Suppose the edge from  $V_0$  to  $V$  in  $M_0$  is removed in  $M_m$ . Here “edge removal” means that there is an edge from  $V_0$  to  $V$  in  $M_0$ , but there is no edge from  $V_0$  (or the node that replaces  $V_0$ ) to  $V$  (or the node that replaces  $V$ ) in  $M_m$ . Note that  $V_0$  is a nu-leaf node in  $M_0$ , which is not necessarily the case for  $V$ . Hence we consider each of the following cases:

- (i)  $V$  is not swapped with any other nodes, i.e.,  $V \notin \{V_{i_1}, \dots, V_{i_m}, V_{j_1}, \dots, V_{j_m}\}$ . This means that  $V_0$  is a parent of  $V$  in  $M_0$ , but  $V_0$  (or the node that replaces  $V_0$ ) is not a parent of  $V$  in  $M_m$ .
- (ii)  $V = V_{i_k}$  for some  $k \in [m]$ . This means that  $V_0$  is a parent of a center node  $V_{i_k}$  in  $M_0$ , but  $V_0$  (or the node that replaces  $V_0$ ) is not a parent of the center node  $V_{j_k}$  in  $M_m$ .
- (iii)  $V = V_{j_k}$  for some  $k \in [m]$ . This means that  $V_0$  is a parent of a non-center node  $V_{j_k}$  in  $M_0$ , but  $V_0$  (or the node that replaces  $V_0$ ) is not a parent of the non-center node  $V_{i_k}$  in  $M_m$ .

*Case (i).* Suppose  $V$  is not swapped with any other nodes. Since the edge from  $V_0$  to  $V$  is removed in  $M_m$ ,  $V$  has at least one less parent in  $M_m$  than in  $M_0$ . This means that the total effects of  $An_{M_m}(V)$  on  $V$ , i.e.,  $TE_{M_m}(An_{M_m}(V), V)$ , can be written as a linear combination of the total effects of  $An_{M_m}(V)$  on parents of  $V$  in  $M_m$ , i.e., vectors in  $\{TE_{M_m}(An_{M_m}(V), V') : V' \in Pa_{M_m}(V)\}$ . Further, following the procedure of swapping centers, all parents of  $V$  in  $M_m$  are possible parents of  $V$  in  $M_0$ . Note that  $TE_{M_m}(An_{M_m}(V), V) = TE_{M_0}(An_{M_0}(V), V)$ , and for any possible parents  $V'$  of  $V$  in  $M_0$ ,  $TE_{M_m}(An_{M_m}(V), V') = TE_{M_0}(An_{M_0}(V), V')$ . Therefore,  $V$  violates Assumption 2(b1) on  $M_0$ .

*Case (ii).* Suppose  $V = V_{i_k}$  for some  $k \in [m]$ . Since the edge from  $V_0$  to  $V_{j_k}$  is removed in  $M_m$ ,  $V_{j_k}$  has at least one less parent in  $M_m$  than  $V_{i_k}$  has in  $M_0$ . This means that  $TE_{M_m}(An_{M_m}(V_{j_k}), V_{j_k})$  can be written as a linear combination of at most  $|Pa_{M_0}(V_{i_k})| - 1$  vectors in  $\{TE_{M_m}(An_{M_m}(V_{j_k}), V') : V' \in Pa_{M_m}(V_{j_k})\}$ . Note that  $|Pa_{M_0}(V_{i_k}) \cup Pa_{M_0}(V_{j_k})| - 1 = |Pa_{M_0}(V_{i_k})|$  since  $Pa_{M_0}(V_{j_k}) \setminus \{V_{i_k}\}$  is a subset of  $Pa_{M_0}(V_{i_k})$ . Further, all parents of  $V_{j_k}$  in  $M_m$  are possible parents of  $V_{i_k}$  in  $M_0$ . Note that  $TE_{M_0}(An_{M_0}(V_{j_k}) \setminus \{V_{i_k}\}, V_{j_k}) = TE_{M_m}(An_{M_m}(V_{j_k}), V_{j_k})$ , and for any possible parents  $V'$  of  $V_{i_k}$  in  $M_0$ ,  $TE_{M_0}(An_{M_0}(V_{j_k}) \setminus \{V_{i_k}\}, V') = TE_{M_m}(An_{M_m}(V_{j_k}), V')$ . Therefore,  $V_{j_k}$  violates Assumption 2(b2) on  $M_0$ .

*Case (iii).* Suppose  $V = V_{j_k}$  for some  $k \in [m]$ . Note that following the procedure of swapping centers, for any  $g > k$ , replacing  $V_{i_g}$  by  $V_{j_g}$  does not change the structural equations of  $V_{i_k}$  and  $V_{j_k}$ . Therefore, if  $V_0$  (or the node that replaces  $V_0$ ) is not a parent of  $V_{i_k}$  in  $M_m$ , then it is not a parent of  $V_{i_k}$  in  $M_k$ . Further, according to Equations (13) and (16), when replacing  $V_{j_k}$  by  $V_{i_k}$ , the parent set of  $V_{i_k}$  in  $M_k$ , excluding  $V_{j_k}$ , is exactly the same as the parent set of  $V_{j_k}$  before the swapping (i.e., in  $M_{k-1}$ ) excluding  $V_{i_k}$ . Therefore,  $V_0$  (or the node that replaces  $V_0$ ) is not a parent of  $V_{j_k}$  in  $M_{k-1}$ , while  $V_0$  is a parent of a  $V_{j_k}$  in  $M_0$ . Recall that  $V_{j_k}$  is not swapped with any other nodes from  $M_0$  to  $M_{k-1}$ . Therefore this reduces to the Case (i) above, which indicates that  $V_{j_k}$  violates Assumption 2(b1) in  $M_0$ .

In conclusion, if the ground-truth satisfies Assumption 2, then the procedure of swapping centers described in Part (1) does not remove any edge from  $M_0$ .

**Proof of (3):** From Parts (1) and (2), we conclude that the structure of the new model  $M_m$  is isomorphic to  $M_0$ . Specifically, we can construct a mapping  $\sigma$  from the nodes in  $M_0$  to the nodes in  $M_m$ , where

$$\begin{aligned} \sigma(V) &= V, \quad V \in \mathcal{Z} \cup \mathcal{Y} \setminus \{V_{i_1}, \dots, V_{i_m}, V_{j_1}, \dots, V_{j_m}\}; \\ \sigma(V_{i_k}) &= V_{j_k}, \quad \sigma(V_{j_k}) = V_{i_k}, \quad \forall k \in [m]. \end{aligned}$$

Under this mapping, there is an edge from node  $V'$  to  $V''$  in  $M_0$  if and only if this is an edge from  $\sigma(V')$  to  $\sigma(V'')$  in  $M_m$ , for all  $V', V'' \in \mathcal{Z} \cup \mathcal{Y}$ . Note that this mapping only switches pairs of nodes that belong to the same direct ordered group. This means that  $M_m$  has the same edges across groups, which completes the proof of Proposition 3.

In the following, we show that if  $M_0$  satisfies Assumption 2, then  $M_m$  satisfies Assumption 2. Note that since the DOG is a more refined partition of AOG, according to the proof of Theorem 2, Assumption 2(a) is satisfied. Therefore we only need to verify Assumption 2(b). For each variable  $V$ , we consider each of the three following cases:

- (i)  $V \notin \{V_{i_1}, \dots, V_{i_m}, V_{j_1}, \dots, V_{j_m}\}$ , i.e.,  $V$  is not changed from  $M_0$  to  $M_m$ .
- (ii)  $V = V_{i_k}$  for some  $k \in [m]$ , i.e.,  $V$  is a center node in  $M_0$  and is changed to a non-center node in  $M_m$ .
- (iii)  $V = V_{j_k}$  for some  $k \in [m]$ , i.e.,  $V$  is a non-center node in  $M_0$  and is changed to a center node in  $M_m$ .



*Case (i).* Suppose  $V \notin \{V_{i_1}, \dots, V_{i_m}, V_{j_1}, \dots, V_{j_m}\}$ . Note that any possible parent of  $V$  in  $M_0$  is also a possible parent of  $V$  in  $M_m$ , and for all  $V' \in \{\text{Possible parents of } V \text{ in } M_m\} \cup \{V\}$ ,  $\text{TE}_{M_0}(\text{An}_{M_0}(V), V') = \text{TE}_{M_m}(\text{An}_{M_m}(V), V')$ . Further, if the parent set of any u-leaf node  $V'$  in  $M_0$  is a subset of  $Pa_{M_0}(V)$ , then the parent set of any u-leaf node in this direct ordered group in  $M_m$  is a subset of  $Pa_{M_m}(V)$ . Therefore Assumption 2(b1) holds for  $V$  on  $M_m$ .

Similarly, for Assumption 2(b2), for each parent  $V_0$  of u-leaf node  $V$  in  $M_m$ , denote  $V'_0$  as the center of the direct ordered group of  $V_0$  in  $M_m$ . Then any possible parent of  $V'_0$  in  $M_0$  is also a possible parent of  $V_0$  in  $M_m$ , and for all  $V' \in \{\text{Possible parents of } V_0 \text{ in } M_m\} \cup \{V\}$ ,  $\text{TE}_{M_0}(\text{An}_{M_0}(V) \setminus \{V'_0\}, V') = \text{TE}_{M_m}(\text{An}_{M_m}(V) \setminus \{V'_0\}, V')$ . Therefore Assumption 2(b2) holds for  $V$  on  $M_m$ .

*Case (ii).* Suppose  $V = V_{i_k}$  for some  $k \in [m]$ . Since  $V_{i_k}$  is a nu-leaf node in  $M_0$ ,  $\text{TE}_{M_0}(\text{An}_{M_0}(V_{i_k}), V_{i_k}) = \text{TE}_{M_m}(\text{An}_{M_m}(V_{i_k}) \setminus \{V_{j_k}\}, V_{i_k})$ . Further, any possible parent of  $V_{i_k}$  in  $M_0$  is a possible parent of  $V_{j_k}$  in  $M_m$ , and  $|Pa_{M_0}(V_{i_k})| = |Pa_{M_m}(V_{j_k})| = |Pa_{M_m}(V_{j_k}) \cup Pa_{M_m}(V_{i_k}) \setminus \{V_{j_k}\}|$ . Besides, if the parent set of any u-leaf node  $V'$  in  $M_0$  is a subset of  $Pa_{M_0}(V_{i_k})$ , then the parent set of any u-leaf node in this direct ordered group in  $M_m$  is also a subset of  $Pa_{M_m}(V_{j_k})$ . Therefore, since Assumption 2(b1) holds for  $V_{i_k}$  on  $M_0$ , Assumption 2(b2) holds for  $V_{i_k}$  on  $M_m$ .

As for Assumption 2(b1), note that the set of possible parents of  $V_{i_k}$  in  $M_m$  includes all other variable in the same ancestral ordered group as  $V_{i_k}$  in  $M_0$ , and is not the same as the set of possible parents of  $V_{i_k}$  in  $M_0$ . If  $\text{TE}_{M_m}(\text{An}_{M_m}(V_{i_k}), V_{i_k})$  can be written as a linear combination of  $k \leq |Pa_{M_m}(V_{i_k})|$  vectors from the set  $\{\text{TE}_{M_m}(\text{An}_{M_m}(V_{i_k}), V') : V' \text{ is a possible parent of } V_{i_k} \text{ in } M_0\}$ , denote the set of the possible parents that corresponds to these vectors as  $\mathcal{K}$ . Then at least one of the variables in  $\mathcal{K}$  belongs to the ancestral ordered group of  $V_{i_k}$  in  $M_0$ . Denote this variable as  $V$ . This means that  $\text{TE}_{M_m}(\text{An}_{M_m}(V_{i_k}), V)$  can be written as a linear combination of  $k$  vectors which includes  $\text{TE}_{M_m}(\text{An}_{M_m}(V_{i_k}), V_{i_k})$  and  $\{\text{TE}_{M_m}(\text{An}_{M_m}(V_{i_k}), V') : V' \in \mathcal{K} \setminus \{V\}\}$ . Since  $V$  is a u-leaf node in  $M_0$ , any variable in  $\mathcal{K} \setminus \{V\}$  is a possible parent of  $V$  in  $M_0$ , and  $\text{TE}_{M_m}(\text{An}_{M_m}(V_{i_k}), V') = \text{TE}_{M_0}(\text{An}_{M_0}(V), V')$  for all  $V' \in \mathcal{K} \cup \{V_{i_k}\}$ . This means that that  $\text{TE}_{M_0}(\text{An}_{M_0}(V), V)$  can be written as a linear combination of  $k$  vectors which includes  $\text{TE}_{M_0}(\text{An}_{M_0}(V), V_{i_k})$  and  $\{\text{TE}_{M_0}(\text{An}_{M_0}(V), V') : V' \in \mathcal{K} \setminus \{V\}\}$ . Besides, according to our condition,  $|Pa_{M_m}(V_{i_k})| \leq |Pa_{M_0}(V)|$  (otherwise  $V_{i_k}$  does not belong to the same direct ordered group as  $V_{j_k}$ ). Therefore, since Assumption 2(b1) holds for  $V$  on  $M_0$ ,  $|Pa_{M_0}(V)| = |Pa_{M_m}(V_{i_k})| = k$ , and the parent set of the variables in  $\mathcal{K}$  that are u-leaf nodes in  $M_0$  must be a subset of  $Pa_{M_0}(V)$ . This implies that parent set of the variables in  $\mathcal{K}$  that are u-leaf nodes in  $M_m$  must be a subset of  $Pa_{M_m}(V_{i_k})$ . Therefore, Assumption 2(b1) holds for  $V_{i_k}$  on  $M_m$ .

*Case (iii).* Suppose  $V = V_{j_k}$  for some  $k \in [m]$ . Since  $V_{j_k}$  is a u-leaf node in  $M_0$ ,  $\text{TE}_{M_m}(\text{An}_{M_m}(V_{j_k}), V_{j_k}) = \text{TE}_{M_0}(\text{An}_{M_0}(V_{j_k}) \setminus \{V_{i_k}\}, V_{j_k})$ . Further, any possible parent of  $V_{i_k}$  in  $M_0$  is a possible parent of  $V_{j_k}$  in  $M_m$ , and  $|Pa_{M_m}(V_{j_k})| = |Pa_{M_0}(V_{i_k})|$ . Besides, if the parent set of any u-leaf node  $V'$  in  $M_0$  is a subset of  $Pa_{M_0}(V_{i_k})$ , then the parent set of any u-leaf node in this direct ordered group in  $M_m$  is also a subset of  $Pa_{M_m}(V_{j_k})$ . Therefore, since Assumption 2(b2) holds for  $V_{j_k}$  on  $M_0$ , Assumption 2(b1) holds for  $V_{j_k}$  on  $M_m$ .

To sum up, Assumption 2(b) holds for every variable on  $M_m$ . Hence  $M_m$  satisfies Assumption 2.

**Conclusion:** We showed that by replacing some centers in the ground-truth  $M_0$  by some other nodes in the same direct ordered group, we can get an alternative model  $M_m$  that (1) has the same mixing matrix, (2) has an isomorphic graph structure to  $M_0$ , and (3) satisfies Assumption 2. Therefore we cannot distinguish  $M_0$  from any other model in the DOG equivalence class.

### C.3.2 Proof of sufficiency

To prove sufficiency, we show that any model that has the same mixing matrix as the ground-truth but does not belong to the same DOG equivalence class violates Assumption 2. Recall that Theorem 2 implies that any model with the same mixing matrix as the ground-truth, but does not belong to its AOG equivalence class, violates Assumption 2(a). Consequently, it remains to prove that any model that belongs to the AOG equivalence class of the ground-truth, but does not belong to its DOG equivalence class, violates Assumption 2(b). Recall from Proposition 2 that models in the same AOG equivalence class can be identified by the choice of the centers in each ancestral ordered group. Therefore, we show that, given the ground-truth and the choice of the centers, where at least one selected center does not belong to the direct ordered group of the u-leaf node in the ground-truth: (1) at least one edge is added to the ground-truth; (2) no edge in the ground-truth is removed, and at least one added edge is not removed; (3) the alternative model violates Assumption 2(b). Therefore Proposition 4 holds.

In the following, we refer to the centers as the centers of the ancestral ordered groups, unless otherwise stated.

Suppose that  $V_{i_1}, \dots, V_{i_m}$  represent some centers of the ancestral ordered groups in the ground-truth  $M$ , where  $m \leq p_n$ , and  $\{i_1, \dots, i_m\}$  is consistent with the causal order among the nu-leaf nodes in  $M$ . Now, the centers in  $M'$  are changed from  $V_{i_1}, \dots, V_{i_m}$  to  $V_{j_1}, \dots, V_{j_m}$ , where  $V_{i_k}$  and  $V_{j_k}$  belong to the same ancestral

ordered group,  $\forall k \in [m]$ . Further, at least one pair of  $(V_{i_k}, V_{j_k})$ ,  $k \in [m]$  does not belong to the same direct ordered group.

**Proof of (1):** Consider the same set of models  $M_0, M_1, \dots, M_m$  as in the necessity proof, where  $M_0 = M$ , and  $M_k$  changes the centers  $V_{i_1}, \dots, V_{i_k}$  in  $M_0$  to  $V_{j_1}, \dots, V_{j_k}$ ;  $k \in [m]$ . In the following, we show that if at least one pair of  $(V_{i_g}, V_{j_g})$ ,  $g \in [k]$  does not belong to the direct ordered group, then obtaining  $M_k$  from  $M_0$  as described above adds at least one extra edge.

We start from  $k = 1$ . We have shown that if  $V_{j_1}$  and  $V_{i_1}$  are in the same direct ordered group, then obtaining  $M_1$  from  $M_0$  does not add any edge to the model. Therefore we only focus on the case when  $V_{j_1}$  and  $V_{i_1}$  are in different direct ordered groups. The true structural equations of  $V_{i_1}$  and  $V_{j_1}$  and  $V_{k_1} \in Ch_{M_0}(V_{i_1})$  in  $M_0$  are the same as Equations (12)-(14) so we will not repeat them here. The structural equation of  $V_{j_1}$  in  $M_1$  is:

$$V_{j_1} = \sum_{l: V_l \in Pa_{M_0}(V_{i_1})} a_{j_1 i_1} a_{i_1 l} V_l + \sum_{l_j: V_{l_j} \in Pa_{M_0}(V_{j_1}) \setminus \{V_{i_1}\}} a_{j_1 l_j} V_{l_j} + a_{j_1 i_1} N_{V_{i_1}}.$$

Since the edge  $V_{i_1} \rightarrow V_{j_1}$  satisfies Condition 1,  $Pa_{M_0}(V_{j_1}) \setminus \{V_{i_1}\}$  may not be a subset of  $Pa_{M_0}(V_{i_1})$ . Therefore, by defining  $a'_{j_1 l} \triangleq a_{j_1 i_1} a_{i_1 l} + a_{j_1 l} \mathbf{1}[V_l \in Pa_{M_0}(V_{j_1})]$  for all  $V_l \in Pa_{M_0}(V_{i_1})$ , and  $\mathcal{S}_{j_1} = Pa_{M_0}(V_{j_1}) \setminus (\{V_{i_1}\} \cup Pa_{M_0}(V_{i_1}))$ , the above equation can be written as

$$V_{j_1} = \sum_{V_l \in Pa_{M_0}(V_{i_1})} a'_{j_1 l} V_l + \sum_{l_j: V_{l_j} \in \mathcal{S}_{j_1}} a_{j_1 l_j} V_{l_j} + a_{j_1 i_1} N_{V_{i_1}}. \quad (18)$$

The new structural equation of  $i_1$  is the same as Equation (16), since no parameter calculation is required:

$$V_{i_1} = \frac{1}{a_{j_1 i_1}} V_{j_1} - \sum_{l_j: V_{l_j} \in Pa_{M_0}(V_{j_1}) \setminus \{V_{i_1}\}} \frac{a_{j_1 l_j}}{a_{j_1 i_1}} V_{l_j}. \quad (19)$$

As for  $V_{k_1}$ , using the same analysis as in Equation (18), define  $a'_{k_1 l_k} \triangleq a_{k_1 l_k} - \frac{a_{k_1 i_1} a_{j_1 l_k}}{a_{j_1 i_1}} \mathbf{1}[V_k \in Pa_{M_0}(V_{j_1})]$ , and  $\mathcal{S}_{k_1} = Pa_{M_0}(V_{j_1}) \setminus Pa_{M_0}(V_{k_1})$ . Then structural equation of  $V_{k_1}$  is:

$$V_{k_1} = \sum_{l_k: V_{l_k} \in Pa_{M_0}(V_{k_1}) \setminus \{V_{i_1}\}} a'_{k_1 l_k} V_{l_k} + \sum_{l_j: V_{l_j} \in \mathcal{S}_{k_1}} \frac{a_{j_1 l_j}}{a_{j_1 i_1}} V_{l_j} + \frac{a_{k_1 i_1}}{a_{j_1 i_1}} V_{j_1} + N_{V_{k_1}}. \quad (20)$$

Recall that in  $M_1$ , the structural equations of all underlying variables in  $\mathcal{Z} \cup \mathcal{Y} \setminus \{V_{i_1}, V_{j_1}\} \cup Ch_{M_0}(V_{i_1})$  are the same as  $M_0$ , and the structural equations of  $V_{i_1}, V_{j_1}$  and any  $V_{k_1} \in Ch_{M_0}(V_{i_1})$  in (12)-(14) are replaced by (18)-(20). Since the edge  $V_{i_1} \rightarrow V_{j_1}$  satisfies Condition 1, at least one of the sets in  $\{\mathcal{S}_{j_1}\} \cup \{\mathcal{S}_{k_1} : k \in Ch_{M_0}(V_{i_1})\}$  must be non-empty. Therefore, compared to  $M_0$ , there is at least one edge added in  $M_1$ .

Next consider  $k = 2$ . Similarly, if  $V_{i_2}$  and  $V_{j_2}$  are in the same direct ordered group, then no edges are added to  $M_2$ . If  $V_{i_2}$  and  $V_{j_2}$  belong to different direct ordered groups, then there is at least one edge added to  $M_2$  (compared with  $M_0$ ). Note that this edge may be the same as the edges added to  $M_1$ . However, we will show in Part (2) that at least one of the the added edges after swapping both centers does not cancel out each other. Therefore it is still an added edge compared with  $M_0$ .

By repeating the same procedure for  $k = 3, \dots, m$ , we conclude that, since at least one of the new centers does not belong to the same direct ordered group, at least one more edge is added in  $M_m$  compared to  $M_0$ .

**Proof of (2):** We first show that if  $M_m$  removes any edge from  $M_0$ , then the ground-truth model  $M_0$  violates Assumption 2. The proof is the same as the proof of Part (2) in the necessity proof: We only used the fact that all variables in the same direct ordered group have the same support, which also holds for ancestral ordered group. Therefore if any edge in  $M_0$  is removed, then  $M_0$  violates Assumption 2(b).

Next, we show that there is at least one added edge that cannot be canceled out. We prove by contradiction, i.e., if all added edges cancel out each other in  $M_m$ , then  $M_0$  violates Assumption 2(b). Suppose the edge from  $V_0$  to  $V$  is firstly added in  $M_{k_0}$  for some  $k_0 \in [m]$  and is removed in  $M_m$ . Note that  $V_0$  is a center node in  $M_{k_0}$ , but the position of  $V_0$  might be changed from  $M_0$  to  $M_{k_0-1}$ . Denote  $V'_0$  as the center of the ancestral ordered group of  $V_0$  in  $M_0$  (which might be  $V_0$  itself). Recall from Part (1) that if an edge from  $V_0$  to  $V$  is added, then there must be a causal path from  $V'_0$  to  $V$  in  $M_0$ . We further assume that no edges are added from any ancestor of  $V'_0$  in  $M_0$  to other nodes, and for any variable  $\tilde{V}$  on the causal path from  $V'_0$  to  $V$ , no edges are added from  $V'_0$  to  $\tilde{V}$ . This can be satisfied by selecting  $V'_0$  with the smallest index among all added edges following the causal order, and selecting  $V$  that belongs to the ancestral ordered group with the smallest index among all added edges from  $V_0$ . We consider each of the three following cases:

- (i)  $V$  is not swapped with any other nodes, i.e.,  $V \notin \{V_{i_1}, \dots, V_{i_m}, V_{j_1}, \dots, V_{j_m}\}$ . This means that the edge from  $V_0$  to  $V$  is added in  $M_{k_0}$ , but  $V_0$  is not a parent of  $V$  in  $M_m$ .
- (ii)  $V = V_{i_k}$  for some  $k \geq k_0$ . This means that the edge from  $V_0$  to  $V_{i_k}$  is added in  $M_{k_0}$ , but  $V_0$  is not a parent of  $V_{i_k}$  in  $M_m$ .

- (iii)  $V = V_{j_k}$  for some  $k \geq k_0$ . This means that the edge from  $V_0$  to  $V_{j_k}$  is added in  $M_{k_0}$ , but  $V_0$  is not a parent of  $V_{i_k}$  in  $M_m$ .

*Case (i).* Suppose  $V$  is not swapped with any other nodes. This means that there is a causal path  $V'_0 \rightarrow V_{i_{k_0}} \rightarrow V$  in  $M_0$ , while  $V'_0$  is not connected to  $V$ . Besides, since the edge from  $V_0$  to  $V$  is added by replacing  $V_{i_{k_0}}$  with  $V_{j_{k_0}}$  in  $M_{k_0}$ ,  $V'_0$  is a parent of  $V_{j_{k_0}}$  in  $M_0$ . If all added edges are cancelled out, then  $V$  has at most  $|Pa_{M_0}(V)|$  parents in  $M_m$ , i.e.,  $\text{TE}_{M_0}(An_{M_0}(V), V)$  can be written as the linear combination of at most  $|Pa_{M_0}(V)|$  vectors in  $\{\text{TE}_{M_0}(An_{M_0}(V), V') : V' \in Pa_{M_m}(V)\}$ . Further, if no edges in  $M_0$  are cancelled out in  $M_m$ , then  $V_{j_{k_0}}$  is a parent of  $V$  in  $M_m$ . However,  $V_{j_{k_0}}$  is a u-leaf node in  $M_0$  with parent set not being a subset of  $Pa_{M_0}(V)$  (because  $V'_0 \in Pa_{M_0}(V_{j_{k_0}})$  and  $V'_0 \notin Pa_{M_0}(V)$ ). Therefore  $M_0$  violates Assumption 2(b1).

*Case (ii).* Suppose  $V = V_{i_k}$  for some  $k \in [m]$ . This means that there is a causal path  $V'_0 \rightarrow V_{i_{k_0}} \rightarrow V_{i_k} \rightarrow V_{j_k}$  and a connection from  $V'_0$  to  $V_{j_{k_0}}$  in  $M_0$ . Further, there is a connection from  $V_0$  to  $V_{j_k}$  in  $M_k$  which may or may not be an added edge. If all added edges are cancelled out, then  $V_{j_k}$  has at most  $|Pa_{M_0}(V_{i_k})|$  parents in  $M_m$ , i.e.,  $\text{TE}_{M_0}(An_{M_0}(V_{j_k}) \setminus \{V_{i_k}\}, V_{j_k})$  can be written as the linear combination of at most  $|Pa_{M_0}(V_{i_k})|$  vectors in  $\{\text{TE}_{M_0}(An_{M_0}(V_{j_k}) \setminus \{V_{i_k}\}, V') : V' \in Pa_{M_m}(V_{j_k})\}$ . Note that  $|Pa_{M_0}(V_{i_k})| \leq |Pa_{M_0}(V_{i_k}) \cup Pa_{M_0}(V_{j_k}) \setminus \{V_{i_k}\}|$ , and the equality holds only if  $Pa_{M_0}(V_{j_k}) \setminus \{V_{i_k}\} \subseteq Pa_{M_0}(V_{i_k})$ , i.e., parents of  $V_{j_k}$  in  $M_0$  are all parents of  $V_{i_k}$ , except for  $V_{i_k}$  itself. In this case,  $V_{j_{k_0}}$  is a parent of  $V_{j_k}$  in  $M_m$ , but it is a u-leaf node in  $M_0$  with the parent set not being a subset of  $V_{i_k}$  (because of  $V'_0$ ). Therefore  $M_0$  violates Assumption 2(b2).

*Case (iii).* Suppose  $V = V_{j_k}$  for some  $k \in [m]$ . Note that the proof of Case (iii) in Part (2) of the necessity proof also applies here: If  $V_0$  is not a parent of  $V_{i_k}$  in  $M_m$ , then  $V_0$  is not a parent of  $V_{i_k}$  in  $M_k$ . According to Equations (13) and (19), this means that  $V_0$  is not a parent of  $V_{j_k}$  in  $M_{k-1}$ , which reduces to Case (i) and implies that  $M_0$  violates Assumption 2(b1).

In conclusion, if the ground-truth satisfies Assumption 2, then  $M_m$  has at least one more added edges than  $M_0$ .

**Proof of (3):** From Parts (1) and (2), we conclude that no edges are removed from  $M_0$  in  $M_m$ , and there is at least one edge added in  $M_m$  compared to  $M_0$ . Combining both parts completes the proof of Proposition 4.

In the following we show that because of this additional edge,  $M_m$  violates Assumption 2. Suppose the edge from  $V_0$  to  $V$  is added in  $M_m$ . Similar as Part (2), the position of  $V_0$  might be changed. Denote  $V'_0$  as the center of the ancestral ordered group of  $V_0$  in  $M_0$  (which may be  $V_0$  itself). We consider each of the three following cases:

- (i)  $V$  is not swapped with any other nodes, i.e.,  $V \notin \{V_{i_1}, \dots, V_{i_m}, V_{j_1}, \dots, V_{j_m}\}$ . This means that  $V'_0$  is not a parent of  $V$  in  $M_{k_0}$ , but  $V'_0$  is a parent of  $V$  in  $M_m$ .
- (ii)  $V = V_{i_k}$  for some  $k \in [m]$ . This means that  $V'_0$  is not a parent of  $V_{i_k}$  in  $M_{k_0}$ , but  $V_0$  is a parent of  $V_{j_k}$  in  $M_m$ .
- (iii)  $V = V_{j_k}$  for some  $k \in [m]$ . This means that  $V'_0$  is not a parent of  $V_{j_k}$  in  $M_{k_0}$ , but  $V_0$  is a parent of  $V_{i_k}$  in  $M_m$ .

*Case (i).* Suppose  $V$  does not change its position. If the edge from  $V'_0$  to  $V$  is added in  $M_m$ , then  $V$  has at least one more parent in  $M_m$  than in  $M_0$ , i.e.,  $|Pa_{M_m}(V)| > |Pa_{M_0}(V)|$ . Recall that in the ground-truth,  $\text{TE}_{M_0}(An_{M_0}(V), V)$  can be written as the linear combination of  $|Pa_{M_0}(V)|$  vectors in  $\{\text{TE}_{M_0}(An_{M_0}(V), V') : V' \in Pa_{M_0}(V)\}$ , where parents of  $V$  in  $M_0$  are all possible parents of  $V$  in  $M_m$ . Further, for all  $V' \in Pa_{M_0}(V) \cup \{V\}$ ,  $\text{TE}_{M_0}(An_{M_0}(V), V') = \text{TE}_{M_m}(An_{M_m}(V), V')$ . Therefore,  $\text{TE}_{M_m}(An_{M_m}(V), V)$  can be written as the linear combination of strictly less than  $|Pa_{M_m}(V)|$  vectors in  $\{\text{TE}_{M_m}(An_{M_m}(V), V') : V' \text{ is a possible parent of } (V) \text{ in } M_m\}$ , which means that  $M_m$  violates Assumption 2(b1).

*Case (ii).* Suppose  $V = V_{i_k}$  for some  $k \in [m]$ . In this case,  $V_{j_k}$  has at least one more parents in  $M_m$  than  $V_{i_k}$  has in  $M_0$ , i.e.,  $|Pa_{M_m}(V_{j_k})| > |Pa_{M_0}(V_{i_k})|$ . Further, for all  $V' \in Pa_{M_0}(V_{i_k}) \cup \{V_{i_k}\}$ ,  $\text{TE}_{M_m}(An_{M_m}(V_{i_k}) \setminus \{V_{j_k}\}, V') = \text{TE}_{M_0}(An_{M_0}(V_{i_k}), V')$ , and parents of  $V_{i_k}$  in  $M_0$  are all possible parents of  $V_{j_k}$  in  $M_m$ . Therefore,  $\text{TE}_{M_m}(An_{M_m}(V_{i_k}) \setminus \{V_{j_k}\}, V_{i_k})$  can be written as the linear combination of  $|Pa_{M_0}(V_{i_k})| < |Pa_{M_m}(V_{j_k}) \cup Pa_{M_m}(V_{i_k}) \setminus \{V_{j_k}\}|$  vectors in  $\{\text{TE}_{M_m}(An_{M_m}(V), V') : V' \text{ is a possible parent of } V_{j_k} \text{ in } M_m\}$ , which means that  $M_m$  violates Assumption 2(b2).

*Case (iii).* Suppose  $V = V_{j_k}$  for some  $k \in [m]$ . In this case,  $|Pa_{M_m}(V_{i_k})| > |Pa_{M_0}(V_{j_k})|$ . Recall that  $\text{TE}_{M_0}(An_{M_0}(V_{j_k}), V_{j_k})$  can be written as the linear combination of  $|Pa_{M_0}(V_{j_k})|$  vectors in  $\{\text{TE}_{M_0}(An_{M_0}(V_{j_k}), V') : V' \in Pa_{M_0}(V_{j_k})\}$ . Since  $V_{j_k}$  is a u-leaf node in  $M_0$ ,  $\text{TE}_{M_0}(An_{M_0}(V_{j_k}), V_{i_k})$  can be written as the linear combination of  $|Pa_{M_0}(V_{j_k})|$  vectors in  $\{\text{TE}_{M_0}(An_{M_0}(V_{j_k}), V') : V' \in Pa_{M_0}(V_{j_k}) \cup \{V_{j_k}\} \setminus \{V_{i_k}\}\}$ . Note that for all  $V' \in Pa_{M_0}(V_{j_k}) \cup \{V_{j_k}\}$ ,  $\text{TE}_{M_0}(An_{M_0}(V_{j_k}), V') = \text{TE}_{M_m}(An_{M_m}(V_{i_k}), V')$ , and parents of  $V_{j_k}$  in  $M_0$  other than  $V_{i_k}$  are all possible parents of  $V_{i_k}$  in  $M_m$ . Therefore,  $\text{TE}_{M_m}(An_{M_m}(V_{i_k}), V_{i_k})$  can be written as the linear combination of

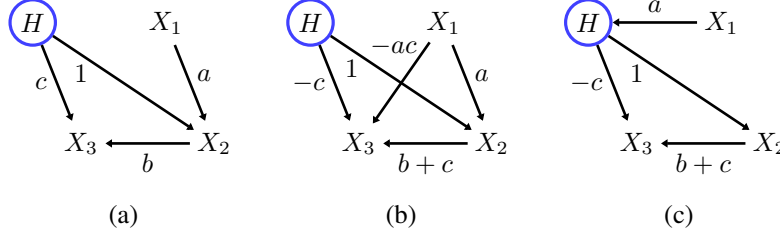

Figure 6: Comparison between our identifiability condition and the results in [1]. (a) The ground-truth of a linear SEM-UR with every edge satisfying Condition 2, but the model violates the conditions in [1]. (b) The alternative linear SEM-UR in the AOG equivalence class, which violates Assumption 3(b). (c) An alternative model (considered in [1]) with the latent variable  $H$  being non-root.

$|Pa_{M_0}(V_{j_k}) \cup \{V_{j_k}\} \setminus \{V_{i_k}\}| = |Pa_{M_0}(V_{j_k})| < |Pa_{M_m}(V_{i_k})|$  vectors in  $\{TE_{M_m}(An_{M_m}(V_{i_k}), V') : V' \text{ is a possible parent of } (V_{i_k}) \text{ in } M_m\}$ , which means that  $M_m$  violates Assumption 2(b1).

To summarize, if any edge is added to the model, then this edge must cause certain violation of Assumption 2.

**Conclusion:** We showed that by replacing some u-leaf nodes in the ground-truth  $M_0$  by some other nodes in ancestral ordered group of each u-leaf node, where at least one of them is not in the same different direct ordered group of the nu-leaf node, the alternative model  $M_m$  (1) has the same mixing matrix, (2) has at least one more edge than the graph structure of  $M_0$ , and (3) violates Assumptions 2. Therefore we can distinguish  $M_0$  from any other model outside the DOG equivalence class.

Combining the necessity part and the sufficiency part together, we conclude that DOG equivalence class is the extent level of identifiability under Assumption 1 and 2.

## D Comparison with partially observed linear causal models

The linear SEM-UR defined in Definition 3 is a subclass of the linear SEM with latent variables proposed in [1]. Specifically, [1] does not require the latent variables to be parent-less. Further, the linear SEM-ME in Definition 2 can also be viewed as a subclass of the model in [1], where the latent variables correspond to unobserved underlying variables,  $\mathcal{Z}$ , and the observed variables correspond to observed underlying variables  $\mathcal{Y}$  and the measurements of  $\mathcal{Z}$  (i.e.,  $\mathcal{U}$ ).

The authors of [1] derived necessary conditions for unique identifiability of the model with the fewest number of edges, which are also sufficient together with ‘‘bottleneck faithfulness assumption’’ (cf. Condition 3). The derived conditions are two-fold: (1) The bottleneck condition, which requires the children set of any (observed or latent) variable  $V_i$  to be the smallest set to block all directed paths from  $V_i$  to its observed descendants; and (2) The strong non-redundancy condition, which requires that the children set of any latent variable  $H_i$  not to be a subset of that of any other variable  $V_i$ , plus  $V_i$  itself.

Recall that from Proposition 4, our identifiability condition also guarantees that if the ground-truth is uniquely identifiable, then any other model that has the same mixing matrix as the ground truth and satisfies conventional faithfulness has strictly more edges. We have shown in Appendix B.4 that our SEM-UR assumption is implied from bottleneck faithfulness assumption. Further, our condition for unique identifiability of a SEM-UR is also implied from the identifiability conditions in [1]. Specifically, for the linear SEM-UR, the bottleneck condition is automatically satisfied, and the strong non-redundancy condition implies Condition 2(a). In contrast, our unique identifiability condition for the linear SEM-UR does not imply the conditions in [1]: A linear SEM-UR satisfying Condition 2 may not be uniquely identifiable in [1]. This is because the model considered in [1] is a larger class than the SEM-UR. An example is shown in Figure 6, where the linear SEM-UR generated according to Figure 6(a) can be uniquely identified (as a SEM-UR). The only other model in its AOG equivalence class is shown in Figure 6(b) (by changing the exogenous noise term associated with  $X_2$  from  $N_{X_2}$  to  $N_H$ ), which violates Assumption 3 and also has more edges than (a). However, the ground-truth is not uniquely identifiable in [1], where an alternative model is shown in Figure 6(c). Note that Figure 6(c) and Figure 6(a) have the same number of edges, and hence [1] cannot distinguish it from the ground-truth. On the contrary, Figure 6(c) is not a SEM-UR since  $H$  has a parent, and can be distinguished from the ground-truth. Note that Figure 6(a) and 6(c) have exactly the same total causal effects among all pairs of observed variables.

Finally, we note that if we were to apply the identifiability result in [1] to the SEM-ME, this leads to a trivial special case. Specifically, if the non-redundancy condition is satisfied, then all leaf nodes must be observed (i.e., there is no u-leaf node in the model). The reasoning behind this is as follows. If there is an unobserved leaf node  $Z_i$  with its measurement  $U_i$ , we can remove  $Z_i$ , and draw edges from the parents of  $Z_i$  to  $U_i$ . The resulting model has the same mixing matrix and one less edge ( $Z_i \rightarrow U_i$  removed). However, this corresponds

to a trivial special case of SEM-ME: If there is no `u-leaf` node, then the SEM-ME can always be uniquely identified, since each `nu-leaf` node is in a separate ancestral ordered group. Consequently, our identifiability results for the linear SEM-ME do not follow from the identifiability results in [1].

## E Numerical experiments

We evaluated the performance of our recovery algorithm on randomly generated linear SEM-MEs and SEM-URs with different number of variables. We considered two cases: (1) when a noisy version of the mixing matrix is given, where the noise is Gaussian with different choices of variance denoted by  $d^2$ , and (2) when synthetic data comes from a linear generating model with non-Gaussian noises with different sample sizes.

### E.1 Simulation settings

**Model generation.** We randomly generate synthetic linear SEM-MEs and SEM-URs as follows. For SEM-ME, we first generate a linear SEM with  $p$  underlying variables, where each pair of observed variables is connected with probability  $p_e$ . Then, we randomly select some of the  $p$  underlying variables to be unobserved (measured with error), where the measurement error is added after the coefficients are drawn; note that we only add measurement error to the unobserved variables corresponding to the non-leaf nodes. The corresponding mixing matrix is calculated (i.e.,  $(\mathbf{I} - \mathbf{A})^{-1}$ ), where  $\mathbf{A}$  is the adjacency matrix among underlying variables in  $\mathcal{Z} \cup \mathcal{Y}$ . For SEM-UR, we generate a SEM with  $q$  observed variables and  $l$  latent variables. Each pair of observed variables, and each pair of latent and observed variables, is connected with probability  $p_e$ . We ensure that each latent variable has at least two children. The strength (coefficients) of the edges in both models are independently drawn from the uniform distribution  $[0.5, 1]$ . After the mixing matrix is obtained, we randomly permute its rows and columns to hide the true causal order.

**Baseline methods.** We compare the performance of our recovery algorithm (which we denote by DOG) with the following methods: (1) AOG-based method (AOG): After recovering the AOG from the mixing matrix, we randomly choose the centers in each ancestral ordered group. We then recover the full model based on the selection of the centers. This approach is similar to the recovery method in [19]. (2) ICA-LiNGAM [21].<sup>7</sup> Note that ICA-LiNGAM method is not designed for systems with latent variables, but benefits from strong performance for recovering the mixing matrix in causally sufficient settings. The goal of this comparison is to demonstrate the necessity of using methods designed specifically to handle latent variables.

We compare with AOG both in Case (1) and Case (2), and we compare with ICA-LiNGAM only in Case (2).

**Metrics.** We compare the recovered matrices with the ground-truth matrix based on the following metrics:

- (1) SHD / Edge: The normalized structural Hamming distance divided by the number of true edges in the graph;
- (2) Precision: The fraction of edges in the recovered model that is also in the ground-truth;
- (3) Recall: The fraction of edges in the ground-truth that can be recovered;
- (4) F1 Score: The harmonic mean of Precision and Recall.

In linear SEM-ME, since we can only recover the ground-truth model up to its DOG equivalence class, we also compared the recovered matrices with the matrix that has the smallest  $l_2$  distance (Frobenius norm) among all models in the DOG equivalence class of the ground-truth. Furthermore, In linear SEM-UR, DOG and AOG methods return both the adjacency matrix  $\mathbf{A}$  among observed variables and the adjacency matrix  $\mathbf{B}$  from latent to observed variables. On the contrary, ICA-LiNGAM only returns the matrix  $\mathbf{A}$ . Therefore, we compare the performance of all three methods in recovering  $\mathbf{A}$ , and we compare the performance of DOG and AOG methods in recovering  $\mathbf{B}$ . Note that  $\mathbf{B}$  can only be learned up to permutation and scaling of the columns.

**Pre-processing of the mixing matrix.** In linear SEM-ME, the mixing matrix used in recovery ( $\mathbf{W}^{ME}$ ) is a submatrix of the overall mixing matrix  $\mathbf{W}$ . Given  $\mathbf{W}$  and the indices corresponding to the unobserved variables, we extract  $\mathbf{W}^{ME}$  from  $\mathbf{W}$  as follows. We first normalize each column by the entry with the largest absolute value. Next, for each index of an unobserved variable  $i$ , we find the column vector in  $\mathbf{W}$  that has the smallest  $l_2$ -distance to the one-hot vector  $e_i$  (i.e., only the  $i$ -th entry is 1), and remove that column from  $\mathbf{W}$ . We repeat until all one-hot vectors of the measurement errors are removed.

We note that the recovery of AOG from the mixing matrix  $\mathbf{W}^{ME}/\mathbf{W}^{UR}$  (cf. Algorithm 1) requires that we can always find a row/column with only one non-zero entry in each iteration of the algorithm. To ensure that the recovered mixing matrix satisfies this property, we sort all non-zero entries in the mixing matrix with respect to their absolute values (from smaller to larger), and iteratively remove the entries with the smallest absolute values until a valid AOG is returned.

<sup>7</sup><https://sites.google.com/view/sshimizu06/lingam>

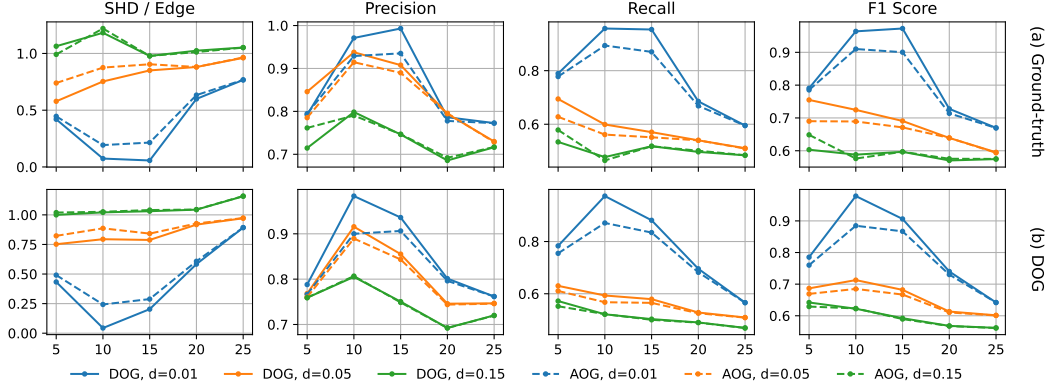

Figure 7: Performance of SEM-ME recovery given the noisy mixing matrix.  $x$ -axis represents the number of total variables ( $p$ ). The first row compares the recovered matrix with the ground-truth, and the second row compares the recovered matrix with its closest in the DOG equivalence class of the ground-truth.

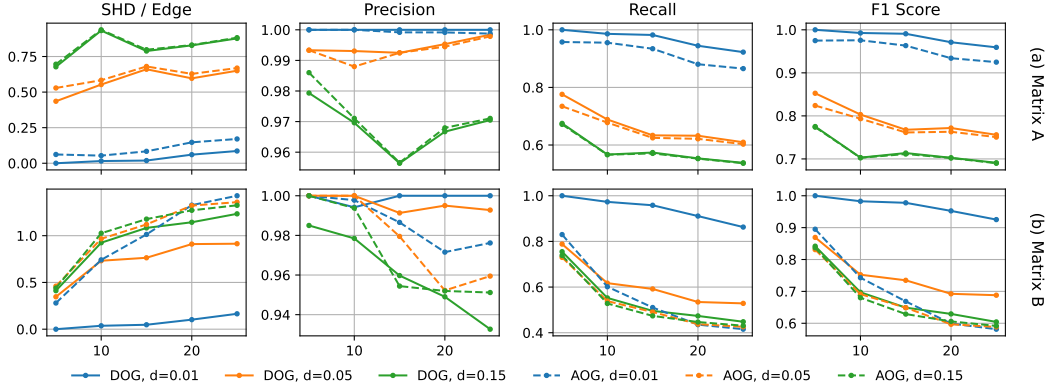

Figure 8: Performance of SEM-UR recovery given the noisy mixing matrix.  $x$ -axis represents the number of total variables ( $q + l$ ). The first row compares the recovery of matrix **A**, and the second row compares the recovery of matrix **B**.

## E.2 Noisy mixing matrix

We test the performance of our method for Case (1), i.e., when a noisy version of the mixing matrix is given. Given the true mixing matrix, the noisy matrix is constructed by first adding an independent Gaussian noise with variance  $d^2$  to each non-zero entry of  $\mathbf{W}$ , and then adding independent Gaussian noise with variance  $d^2$  to each entry of  $\mathbf{W}$  with probability 0.2.  $d$  is the parameter controlling the noise variance, which is selected as [0.01, 0.05, 0.15].

For linear SEM-ME, We select  $p = [5, 10, 15, 20, 25]$ , and we randomly select 80% of the variables to be measured with error. We set  $p_e = 0.4$ , and repeat the simulation for 50 times. The average performance is shown in Figure 7. For linear SEM-UR, We select  $q = [4, 8, 12, 16, 20]$ , and we select  $l = [1, 2, 3, 4, 5]$ , respectively. We set  $p_e = 0.4$ , and repeat the simulation for 50 times. The average performance is shown in Figure 8.

We observe that our DOG method performs better than AOG method for the recovery of both models. Besides, the performance of both algorithms are better if the variance  $d$  is small. Further, Recall from Corollary 3 that all SEM-URs in the same DOG have the same structure. This can be seen in Figure 8, where with  $d=0.01$ , our DOG algorithm has a high accuracy in recovering the graph structure of the ground-truth. As for the recovery of SEM-ME in Figure 7, we observe that even though theoretically the structure of the ground-truth model can only be identified up to the DOG equivalence class, our DOG algorithm can recover part of the ground-truth structure that is shared among the DOG equivalence class.

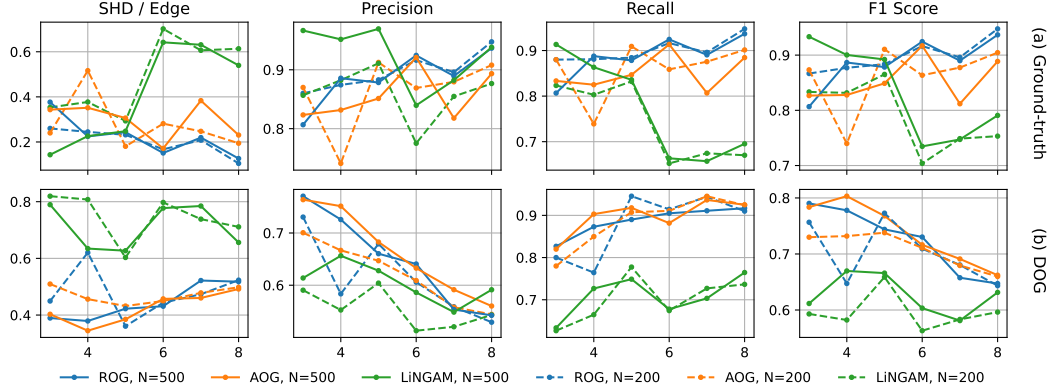

Figure 9: Performance of SEM-ME recovery based on synthetic data.  $x$ -axis represents the number of observed variables ( $p$ ). The first row compares the recovered matrix with the ground-truth, and the second row compares the recovered matrix with its closest in the DOG equivalence class of the ground-truth.

### E.3 Synthetic data with non-Gaussian noises

We test the performance of our recovery algorithm for Case (2), where the synthetic data is generated from the linear causal model with non-Gaussian exogenous noise terms, and the sample size is proportional to the number of observed variables. That is, the sample size can be expressed as  $Np$  (resp.  $Nq$ ), where  $p, q$  are the number of observed variables in both models, and  $N$  is selected to be  $\{200, 500\}$ . In this case, the mixing matrix needs to be estimated using ICA methods. Note that the overall mixing matrices in both problems have more columns than rows, therefore we need to use an overcomplete ICA method. The overcomplete ICA method that we use is Reconstruction ICA [14]. We assume that the number of sources is known for overcomplete ICA.

In linear SEM-ME, we select  $p = 3, 4, 5, 6, 7, 8$ . We assume that when  $p = 3, 4, 5$ , there is only one unobserved non-leaf node, and each leaf node is observed with probability 0.5. Under all three settings, the overall mixing matrix is of dimension  $p \times (p + 1)$ . Similarly, when  $p = 6, 7, 8$ , there are two unobserved non-leaf nodes, and each leaf node is observed with probability 0.5. In linear SEM-UR, we select  $q = 3, 4, 5, 6, 7, 8$ . Similar to SEM-ME, we assume that when  $q = 3, 4, 5$ , there is only one latent confounder, and the overall mixing matrix is of dimension  $q \times (q + 1)$ . When  $p = 6, 7, 8$ , there are two latent confounders in the system. We set  $p_e = \min(0.5, 2.5/(p - 1))$  (resp.  $2.5/(q - 1)$ ) in both models, and the exogenous noises are independently drawn from uniform distributions between  $[-0.5, 0.5]$ .

We use bootstrapping method [6] to improve the stability of the recovery of overcomplete ICA with 50 iterations. In each iteration, we randomly select 80% of the sampled data, and get an estimate of the mixing matrix using Reconstruction ICA. After each iteration, we repermute and rescale the columns of the recovered mixing matrix such that they are aligned with the mixing matrix recovered in the first iteration. Lastly, we use hypothesis testing to prune the recovered mixing matrix and remove the entries whose absolute value is below a threshold of 0.1 in SEM-UR and 0.2 in SEM-ME, with 95% confidence level.

We compared our DOG algorithm with AOG and ICA-LiNGAM for both models (SEM-ME and SEM-UR), and we record the average of the performance metrics after 50 graphs are generated for each model. The performance of recoveries for linear SEM-ME and SEM-UR are shown in Figure 9 and Figure 10, respectively. We observe that the performance of ICA-LiNGAM depends on the number of unobserved variables/latent confounders: There is a sharp decrease in the performance of ICA-LiNGAM when we increase the number of unobserved variables/latent confounders (from 1 unobserved/latent variable for  $p = 3, 4, 5$  to 2 unobserved/latent variables for  $p = 6, 7, 8$ ). On the contrary, DOG and AOG methods outperform ICA-LiNGAM for both models. This implies that developing methods for latent variable models is necessary. Besides, our DOG method outperforms AOG methods for both models, which demonstrates the effectiveness of our proposed algorithm.

### E.4 Plots of the error bars

Figure 4 in the main text includes three algorithms and multiple experimental settings. We chose not to include error bars in that figure so that the presentation does not become cluttered. Instead, here, we report the error bars for the simulation results in Figure 4, for all three algorithms.

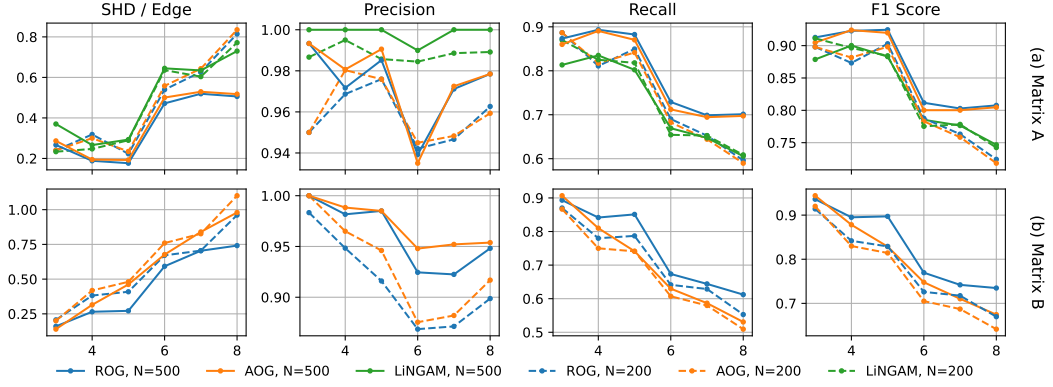

Figure 10: Performance of SEM-UR recovery based on synthetic data.  $x$ -axis represents the number of observed variables ( $q$ ). The first row compares the recovery of matrix **A**, and the second row compares the recovery of matrix **B**. Recall that ICA-LiNGAM only returns matrix **A** as it assumes causal sufficiency.

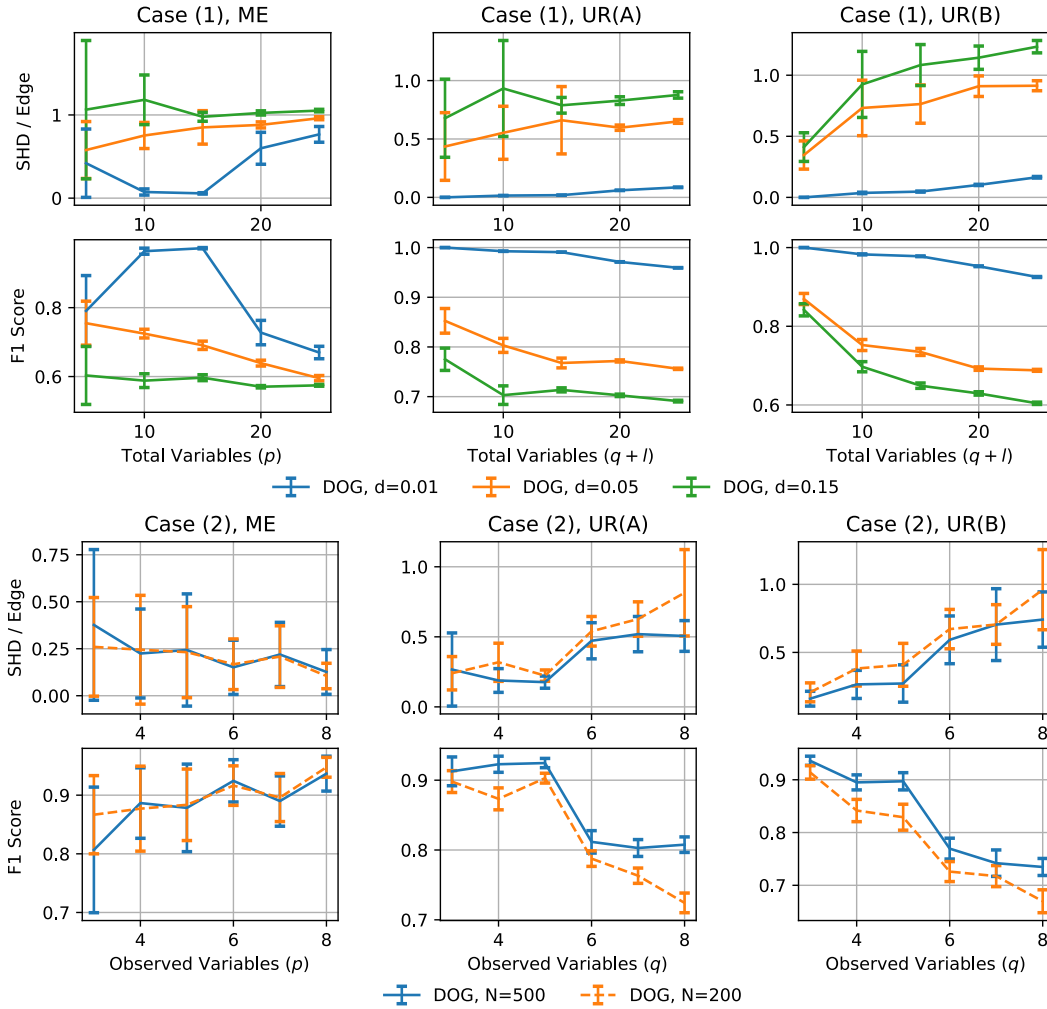

Figure 11: Error bars of DOG algorithm under different settings of the experiment, namely, Case (1) in which we have a noisy mixing matrix; Case (2) where we use raw observational data; SEM-ME recovery; recovery of matrices **A** and **B** for SEM-UR, and different metrics, SHD/Edge and F1 score.



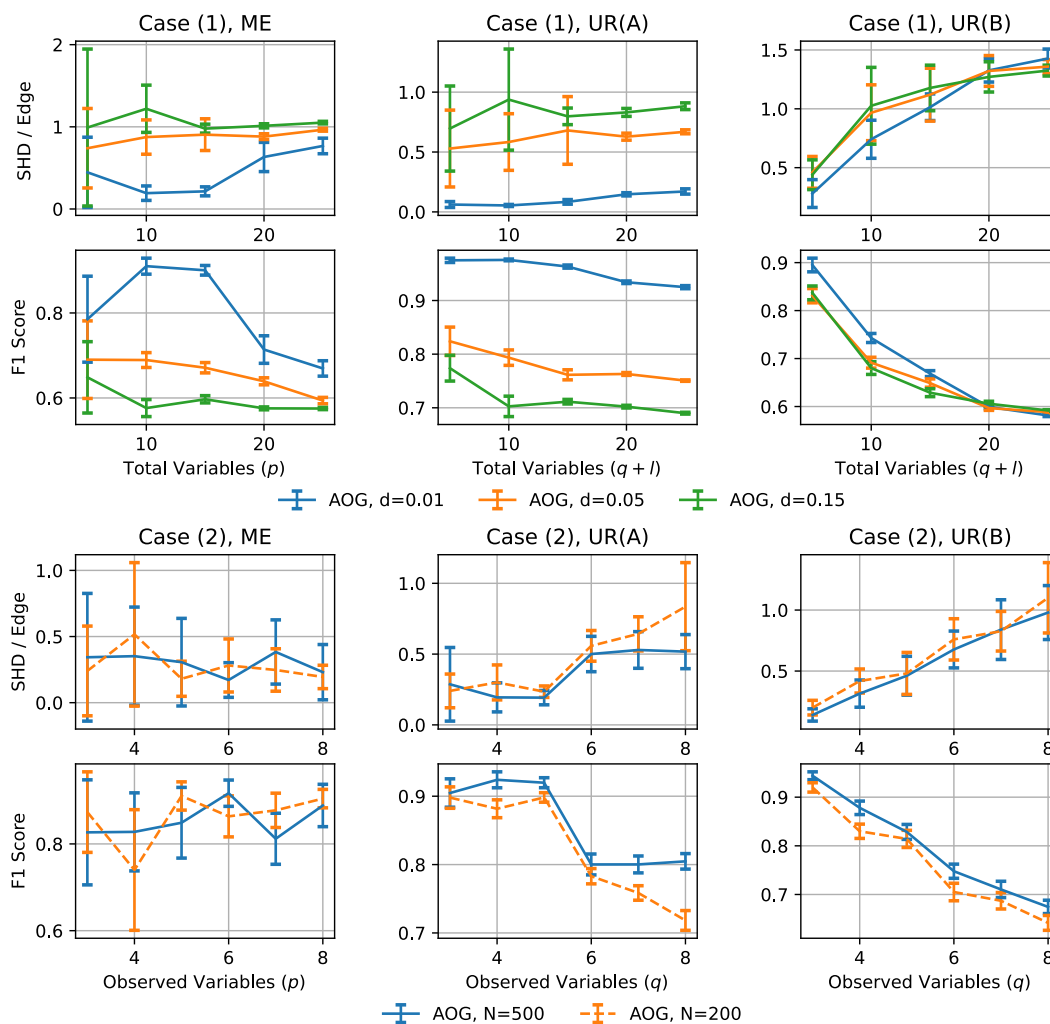

Figure 12: Error bars of the AOG algorithm under different settings of the experiment.

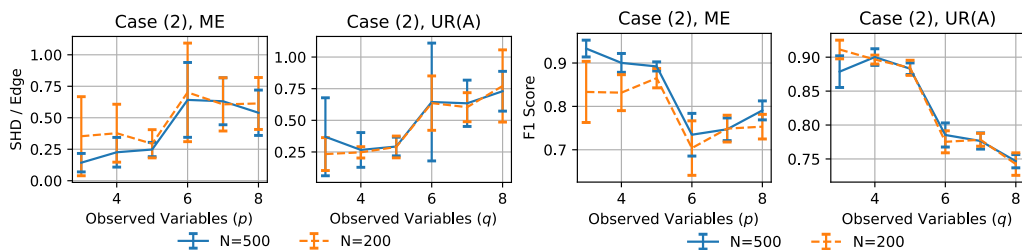

Figure 13: Error bars of ICA-LiNGAM algorithm under different settings of the experiment. Note that since ICA-LiNGAM assumes causal sufficiency, the mixing matrix in ICA-LiNGAM must be a square matrix, i.e., it does not recover matrix  $\mathbf{B}$  for SEM-UR. Additionally, Case (1), i.e., noisy mixing matrix, cannot be applied here, since the true mixing matrix is not square.
